# Supplementary material for: Rational design of a new class of polycyclic organic bases bearing two superbasic sites and their applications in the CO2 capture and activation process
Source: Royal Society of Chemistry journal article supplement (doi:10.1039/c2cc18083a), 2012-01-01
Supplement: c2cc18083a.pdf [file c2cc18083a.pdf]

## Electronic Supplementary Information

# Rational Design of a new class of polycyclic organic bases bearing two superbasic sites and their applications in CO<sub>2</sub> capture and activation process

Rabindranath Lo, Ajeet Singh, Manoj K. Kesharwani and Bishwajit Ganguly\*

Analytical Science Discipline, Central Salt & Marine Chemicals Research Institute (Council of Scientific and Industrial Research), Bhavnagar, Gujarat, India-364002.

E-mail: ganguly@csmcri.org.

### Table of content

| S. No. | Entry name                                                                                                                                                                                                                                                                                                                                | Page No. |
|--------|-------------------------------------------------------------------------------------------------------------------------------------------------------------------------------------------------------------------------------------------------------------------------------------------------------------------------------------------|----------|
| 1      | Computational Section                                                                                                                                                                                                                                                                                                                     | S3       |
| 2      | <b>Table S1</b> Experimental and calculated (B3LYP/6-311+G**//B3LYP/6-31+G*) proton affinities of amine and imine bases.                                                                                                                                                                                                                  | S6       |
| 3      | <b>Table S2</b> Experimental and calculated (B3LYP/6-311+G**//B3LYP/6-31+G*) pKa(MeCN) of amino bases.                                                                                                                                                                                                                                    | S6       |
| 4      | <b>Fig. S1</b> Correlation between experimental and calculated proton affinities of amine and imine bases.                                                                                                                                                                                                                                | S7       |
| 5      | <b>Fig. S2</b> B3LYP/6-31+G* optimized geometry of different conformations of <b>1</b> and their corresponding relative energies.                                                                                                                                                                                                         | S7       |
| 6      | <b>Fig. S3</b> B3LYP/6-31+G* calculated relative energy (kcal/mol) profile diagram for the flipping of chair-boat conformation ( <b>1a.H<sup>+</sup></b> ) to chair-chair conformation ( <b>1.H<sup>+</sup></b> )                                                                                                                         | S8       |
| 7      | <b>Fig. S4</b> B3LYP/6-31+G* calculated geometries for different conformations of <b>2</b> and <b>3</b> , relative energies (kcal/mol), and protonated forms of their most stable conformer. Proton affinity values (PA) were calculated at B3LYP/6-311+G**//B3LYP/6-31+G* level of theory with zero point vibrational energy correction. | S8       |
| 8      | <b>Fig. S5</b> B3LYP/6-31+G* calculated geometries for different conformations of <b>4</b> , relative energies (kcal/mol), and protonated forms of their most stable conformer <b>4a</b> . Proton affinity values (PA) were calculated at B3LYP/6-311+G**//B3LYP/6-31+G* level of theory with zero point vibrational energy correction.   | S9       |
| 9      | <b>Fig. S6</b> B3LYP/6-31+G* calculated geometries for different conformations of <b>5</b> , relative energies (kcal/mol), and protonated forms of their most stable conformer <b>5a</b> . Proton affinity values (PA) were calculated at B3LYP/6-311+G**//B3LYP/6-31+G* level of theory with zero point vibrational energy correction.   | S10      |
| 10     | <b>Fig. S7</b> B3LYP/6-31+G* calculated relative energies (kcal/mol) for the flipping of piperidine ring from boat form ( <b>4a</b> ) to chair form ( <b>4a'</b> )                                                                                                                                                                        | S10      |
| 11     | <b>Fig. S8</b> Isodesmic reactions used to obtain strain energy of unprotonated bases and the sum of the cation strain and the H-bond energies (SE+HB) <sup>+</sup> for their corresponding protonated cations.                                                                                                                           | S11      |
| 12     | <b>Table S3</b> Strain energies (SE) for the unprotonated bases <b>5a</b> and Hydrogen bond + Strain Energies (HB+SE) <sup>+</sup> and Hydrogen bond energies (HB) for their monoprotonated and bis-protonated cations (all in kcal/mol).                                                                                                 | S11      |

|    |                                                                                                                                                                                                                                                                                                 |     |
|----|-------------------------------------------------------------------------------------------------------------------------------------------------------------------------------------------------------------------------------------------------------------------------------------------------|-----|
| 13 | <b>Fig. S9</b> Molecular electrostatic isopotential surfaces of compounds <b>2-5</b> and <b>4a-5a</b> at isosurface value of -0.104 au. The black dot represents the location of the $V_{\min}$ point in each case and is given in kcal/mol.                                                    | S12 |
| 14 | <b>Fig. S10</b> B3LYP/6-31+G* optimized geometries of <b>2</b> and <b>3</b> with isopropyl substitution and their corresponding relative energies.                                                                                                                                              | S13 |
| 15 | <b>Table S4</b> B3LYP/6-311+G**//B3LYP/6-31+G* calculated p <i>K</i> <sub>a</sub> (MeCN) and gas phase proton affinities (kcal/mol) of amino and imino bases.                                                                                                                                   | S13 |
| 16 | Thermodynamics of the capture of CO <sub>2</sub>                                                                                                                                                                                                                                                | S14 |
| 17 | <b>Fig. S11</b> B3LYP/6-31+G* optimized geometry of propylcarbonate salt made from superbase <b>4a</b> (a) 1 <sup>st</sup> site, (b) 2 <sup>nd</sup> site.                                                                                                                                      | S14 |
| 18 | <b>Table S5</b> Thermodynamics of the capture of CO <sub>2</sub> by different organic bases in acetonitrile solvent.                                                                                                                                                                            | S15 |
| 19 | B3LYP/6-31+G* SCF energies in gas phase (E), B3LYP/6-31+G* zero point vibrational energies (ZPVE), and Cartesian coordinates for <b>1-5</b> , <b>1a-5a</b> and protonated forms. B3LYP/6-311+G**//B3LYP/6-31+G* SCF energies in gas phase are given in ( ). (All energies are given in Hartee). | S15 |
| 20 | B3LYP/6-31+G* SCF energies in gas phase (E) and Cartesian coordinates for <b>1b-1e</b> (All energies are given in Hartee).                                                                                                                                                                      | S27 |
| 21 | B3LYP/6-31+G* SCF energies in gas phase (E) and Cartesian coordinates for <b>2-CHMe<sub>2</sub>-ax</b> , <b>2-CHMe<sub>2</sub>-eq</b> , <b>3-CHMe<sub>2</sub>-ax</b> and <b>3-CHMe<sub>2</sub>-eq</b> (All energies are given in Hartee).                                                       | S29 |

## Computational Section

Calculations were performed for compound **1-5** with the density functional theory using Becke's three-parameter hybrid functional with correlation formula of Lee, Yang, and Parr (B3LYP).<sup>1</sup> All these species were fully optimized with 6-31+G\* basis set,<sup>2</sup> and harmonic vibrational frequency calculations were used to confirm that the optimized structures were minima, as characterized by positive vibrational frequencies. Zero-point vibrational energies (ZPVE) computed at B3LYP/6-31+G\* level used in the proton affinity calculations are unscaled. Proton affinities calculated at B3LYP/6-311+G\*\*//B3LYP/6-31+G\* level employing the general equation:  $PA(B) = (\Delta E_{el}) + (\Delta ZPVE)$ , where  $(\Delta E_{el}) = [E(B) - E(BH^+)]$  and  $(\Delta ZPVE) = [ZPVE(B) - ZPVE(BH^+)]$  are the electronic and the Zero-point vibrational energy contributions to the proton affinity, respectively. Here, B and  $BH^+$ , denote the base in question and its conjugate acid, respectively.

The MESP was calculated using equation 1 where  $Z_A$  was the charge on nucleus A, situated at  $R_A$  and  $\rho(r')$  is the electron density.<sup>3</sup>

$$V(r) = \sum_A^N \frac{z_A}{|r-R_A|} - \int \frac{\rho(r') d^3r'}{|r-r'|} \quad (1)$$

In general, electron rich regions are shown by highly negative MESP whereas electron deficient regions are characterized by positive MESP.<sup>4</sup> The most negative valued point ( $V_{min}$ ) in electron rich regions can be determined from the MESP topography calculation.<sup>5</sup> Molecular electrostatic potential (MESP) calculations have been performed at the B3LYP/6-311+G\*\* level of theory. Solvent effects are taken into account by means of the polarizable continuum model (PCM)<sup>6-10</sup> through single-point energy calculations at the B3LYP/6-311+G\*\* level of theory (using the gas-phase optimized geometries).

The pKa calculations have been performed using the standard thermodynamical cycle<sup>11</sup> depicted in Scheme 1,

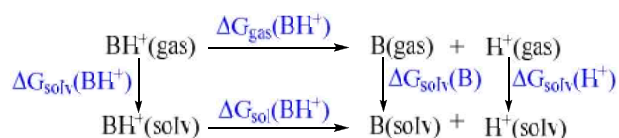

Scheme 1

The pKa value of the acid  $BH^+$  is calculated using the following relation,

$$pKa = \Delta G_{sol} / 2.303RT$$

Where,  $\Delta G_{sol} = \Delta G_{gas} + \Delta \Delta G_{solv} + \Delta G_{corr}$

$\Delta G_{gas}$  is the Gibbs free energy change of the reaction in the gas phase and  $\Delta \Delta G_{solv}$  is the difference in solvation free energies ( $\Delta G_{solv}$ ) between products and reactants.  $\Delta G_{corr}$  is the correction associated to the

change in standard state from gas phase (1 atm) to solution (1 mol/L) and its value at 298.15 K is 1.89 kcal/mol.<sup>12</sup>

Now  $\Delta G_{\text{sol}}$  can be expressed as:

$$\Delta G_{\text{sol}} = G_{\text{gas}}(\text{B}) + \Delta G_{\text{solv}}(\text{B}) + G_{\text{gas}}(\text{H}^+) + \Delta G_{\text{solv}}(\text{H}^+) - G_{\text{gas}}(\text{BH}^+) - \Delta G_{\text{solv}}(\text{BH}^+) + 1.89$$

Here, the value of Gibbs free energy of the proton in the gas phase is set to -6.28 kcal/mol using translational entropy calculated according to the well-known Sackur-Tetrode equation<sup>13</sup> and the value of Gibbs free energy of proton in acetonitrile solvent phase taken as -250.76 kcal/mol.<sup>14</sup>

The  $\Delta G_{\text{solv}}$  values in B3LYP/6-31+G\* optimized geometry with UAHF radii and 'scfvac' keyword using acetonitrile ( $\epsilon = 36.64$ ) as a solvent.<sup>15</sup> Both electrostatic and nonelectrostatic (i.e., cavitation, repulsion and dispersion) terms were included in the calculation of  $\Delta G_{\text{solv}}$  values. The calculation of absolute pKa is complicated from first principle study, partly because of the difficulty in computing accurate gas-phase deprotonation free energies for charged species.<sup>16</sup> It has been noted that the accuracy of solvation energy depends upon the shape and size of the dielectric cavity of the molecule in which the solute is embedded.<sup>17</sup> Here, we have employed 'UAHF' radii for solvation energy calculation in solution to calculate the pKa of these superbases. The solvent cavity 'UFF' model has been found to be more suitable for the predictions of pKa for these acyclic amines (Table S2). All quantum chemical calculations were performed using Gaussian 03, Revision E.01 program.<sup>18</sup>

#### References:

- 1 (a) A. D. Becke, *J. Chem. Phys.*, 1993, **98**, 5648; (b) C. Lee, W. Yang and R. G. Parr, *Phys. Rev. B*, 1988, **37**, 785.
- 2 W. J. Hehre, L. Radom, P. v. R Schleyer and J. A. Pople, *Ab initio Molecular Orbital Theory*, Wiley, New York, **1988**.
- 3 P. Politzer, J. S. Murray, in *Reviews in Computational Chemistry*, vol 2. (Eds: K. B. Lipkowitz, D. B. Boyd) VCH Publishers, New York (ch 7) 1991, **2**, 273.
- 4 (a) J. Tomasi, R. Bonaccorsi and R. Cammi, *Theoretical Models of Chemical Bonding* (Ed: R. Maksic) Springer, Berlin, 1990, 230; (b) R. K. Pathak and S. R. Gadre, *J. Chem. Phys.*, 1990, **93**, 1770; (c) E. Scrocco and J. Tomasi, *Adv. Quantum Chem.*, 1979, **11**, 115; (d) J. S. Murray and P. Politzer, *J. Mol. Struct.: THEOCHEM*, 1998, **425**, 107; (e) T. Brinck, J. S. Murray and P. Politzer, *Mol. Phys.*, 1992, **76**, 609.
- 5 (a) J. S. Murray and P. Politzer, *Chem. Phys. Lett.*, 1988, **152**, 364; (b) M. Haeberlein, J. S. Murray, T. Brinck and P. Politzer, *Can. J. Chem.*, 1992, **70**, 2209; (c) C. H. Suresh, *Inorg. Chem.*, 2006, **45**, 4982.
- 6 J. Tomasi and M. Persico, *Chem. Rev.*, 1994, **94**, 2027.
- 7 M. Cossi, V. Barone, R. Cammi and J. Tomasi, *Chem. Phys. Lett.*, 1996, **255**, 327.
- 8 V. Barone, M. Cossi and J. Tomasi, *J. Chem. Phys.*, 1997, **107**, 3210.

- 9 V. Barone, M. Cossi and J. Tomasi, *J. Comput. Chem.*, 1998, **19**, 404.
- 10 M. Cossi and V. Barone, *J. Chem. Phys.*, 1998, **109**, 6246.
- 11 G. I. Almerindo, D. W. Tondo and J. R. Pliego Jr., *J. Phys. Chem. A.*, 2004, **108**, 166.
- 12 D. M. Camaioni and C. A. Schwerdtfeger, *J. Phys. Chem. A.*, 2005, **109**, 10795.
- 13 I. A. Topol, G. J. Tawa, S. K. Burt and A. A. Rashin, *J. Phys. Chem. A.*, 1997, **101**, 10075.
- 14 A. A. Magill, K. J. Cavell and B. F. Yates, *J. Am. Chem. Soc.*, 2004, **126**, 8717.
- 15 (a) T. N. Brown and N. Mora-Diez, *J. Phys. Chem. B.*, **2006**, *110*, 9270-9279; (b) A. Trummel, A. Rummel, E. Lippmaa, P. Burk and I. A. Koppel, *J. Phys. Chem. A.*, 2009, **113**, 6206.
- 16 (a) J. Tomasi, B. Mennucci and R. Cammi, *Chem. Rev.*, 2005, **105**, 2999; (b) V. P. Kumar, B. Ganguly and S. Bhattacharya, *J. Org. Chem.*, 2004, **69**, 8634.
- 17 R. B. Ardakani, M. A. Karimi and A. Ebady, *J. Mol. Struct.: THEOCHEM*, 2009, **910**, 99.
- 18 M. J. Frisch, G. W. Trucks, H. B. Schlegel, G. E. Scuseria, M. A. Robb, J. R. Cheeseman, J. A. Montgomery, Jr., T. Vreven, K. N. Kudin, J. C. Burant, J. M. Millam, S. S. Iyengar, J. Tomasi, V. Barone, B. Mennucci, M. Cossi, G. Scalmani, N. Rega, G. A. Petersson, H. Nakatsuji, M. Hada, M. Ehara, K. Toyota, R. Fukuda, J. Hasegawa, M. Ishida, T. Nakajima, Y. Honda, O. Kitao, H. Nakai, M. Klene, X. Li, J. E. Knox, H. P. Hratchian, J. B. Cross, V. Bakken, C. Adamo, J. Jaramillo, R. Gomperts, R. E. Stratmann, O. Yazyev, A. J. Austin, R. Cammi, C. Pomelli, J. W. Ochterski, P. Y. Ayala, K. Morokuma, G. A. Voth, P. Salvador, J. J. Dannenberg, V. G. Zakrzewski, S. Dapprich, A. D. Daniels, M. C. Strain, O. Farkas, D. K. Malick, A. D. Rabuck, K. Raghavachari, J. B. Foresman, J. V. Ortiz, Q. Cui, A. G. Baboul, S. Clifford, J. Cioslowski, B. B. Stefanov, G. Liu, A. Liashenko, P. Piskorz, I. Komaromi, R. L. Martin, D. J. Fox, T. Keith, M. A. Al-Laham, C. Y. Peng, A. Nanayakkara, M. Challacombe, P. M. W. Gill, B. Johnson, W. Chen, M. W. Wong, C. Gonzalez and J. A. Pople, Gaussian 03, Revision E.01, Gaussian, Inc., Wallingford CT, **2004**.

**Table S1** Experimental and calculated (B3LYP/6-311+G\*\*//B3LYP/6-31+G\*) proton affinities of amine and imine bases.

| Compound                                                          | Proton Affinity (kcal/mol) |                         |
|-------------------------------------------------------------------|----------------------------|-------------------------|
|                                                                   | Experimental               | Calculated <sup>d</sup> |
| CH <sub>2</sub> =NH                                               | 205.5 <sup>a</sup>         | 206.1                   |
| CH <sub>3</sub> -NH <sub>2</sub>                                  | 214.9 <sup>b</sup>         | 213.1                   |
| (CH <sub>3</sub> ) <sub>2</sub> NH                                | 222.2 <sup>b</sup>         | 220.1                   |
| H <sub>2</sub> N-(CH <sub>2</sub> ) <sub>2</sub> -NH <sub>2</sub> | 227.1 <sup>c</sup>         | 225.5                   |
| H <sub>2</sub> N-(CH <sub>2</sub> ) <sub>3</sub> -NH <sub>2</sub> | 233.0 <sup>c</sup>         | 233.1                   |

<sup>a</sup> S. Hammerum and T. I. Sølling, *J. Am. Chem. Soc.*, 1999, **121**, 6002 and references therein.

<sup>b</sup> C. Wesdemiotis, *J. Mass Spectrom.*, **2004**, *39*, 998.

<sup>c</sup> R. Yamdagni and P. Kebarle, *J. Am. Chem. Soc.*, **1973**, *95*, 3504.

<sup>d</sup> Zero point vibrational energy corrected.

**Table S2** Experimental and calculated (B3LYP/6-311+G\*\*//B3LYP/6-31+G\*) pK<sub>a</sub>(MeCN) of amino bases.

| Compounds                                                         | Experimental      | Calculated |      |
|-------------------------------------------------------------------|-------------------|------------|------|
|                                                                   |                   | UFF        | UAHF |
| CH <sub>3</sub> -NH <sub>2</sub>                                  | 18.4 <sup>a</sup> | 16.6       | 10.5 |
| (CH <sub>3</sub> ) <sub>2</sub> NH                                | 18.7 <sup>a</sup> | 17.2       | 12.0 |
| H <sub>2</sub> N-(CH <sub>2</sub> ) <sub>2</sub> -NH <sub>2</sub> | 18.5 <sup>b</sup> | 17.2       | 14.9 |
| H <sub>2</sub> N-(CH <sub>2</sub> ) <sub>3</sub> -NH <sub>2</sub> | 19.7 <sup>b</sup> | 20.1       | 18.1 |

<sup>a</sup> J. -N. Li, Y. Fu, L. Liu and Q. -X. Guo, *Tetrahedron*, 2006, **62**, 11801 and references therein.

<sup>b</sup> E. Rõõm, A. Kütt, I. Kaljurand, I. Koppel, I. Leito, I. A. Koppel, M. Mishima, K. Goto and Y. Miyahara, *Chem. Eur. J.*, 2007, **13**, 7631.

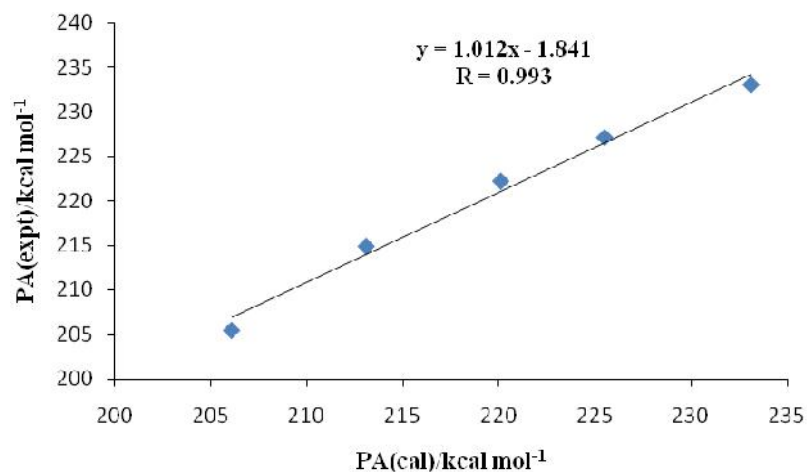

**Fig. S1** Correlation between experimental and calculated proton affinities of amine and imine bases.

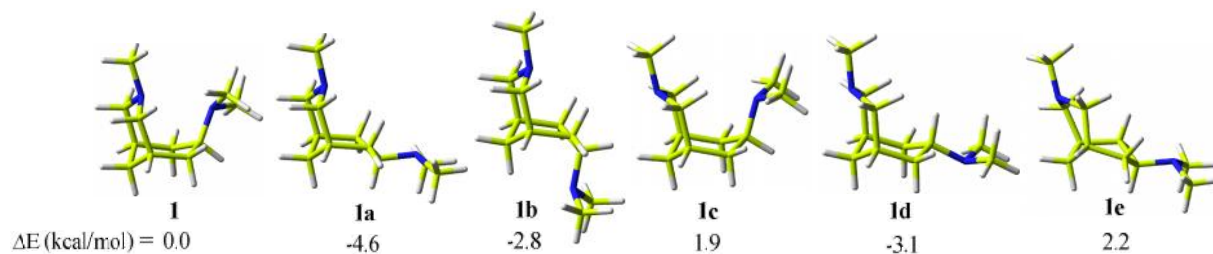

**Fig. S2** B3LYP/6-31+G\* optimized geometry of different conformations of **1** and their corresponding relative energies. [Green-yellow = carbon; blue = nitrogen; and white = hydrogen].

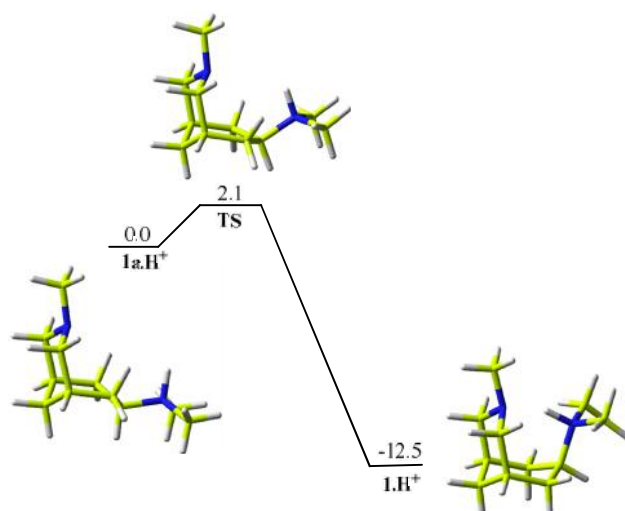

**Fig. S3** B3LYP/6-31+G\* calculated relative energy (kcal/mol) profile diagram for the flipping of chair-boat conformation ( $1a.H^+$ ) to chair-chair conformation ( $1.H^+$ ) [Green-yellow = carbon; blue = nitrogen; and white = hydrogen]

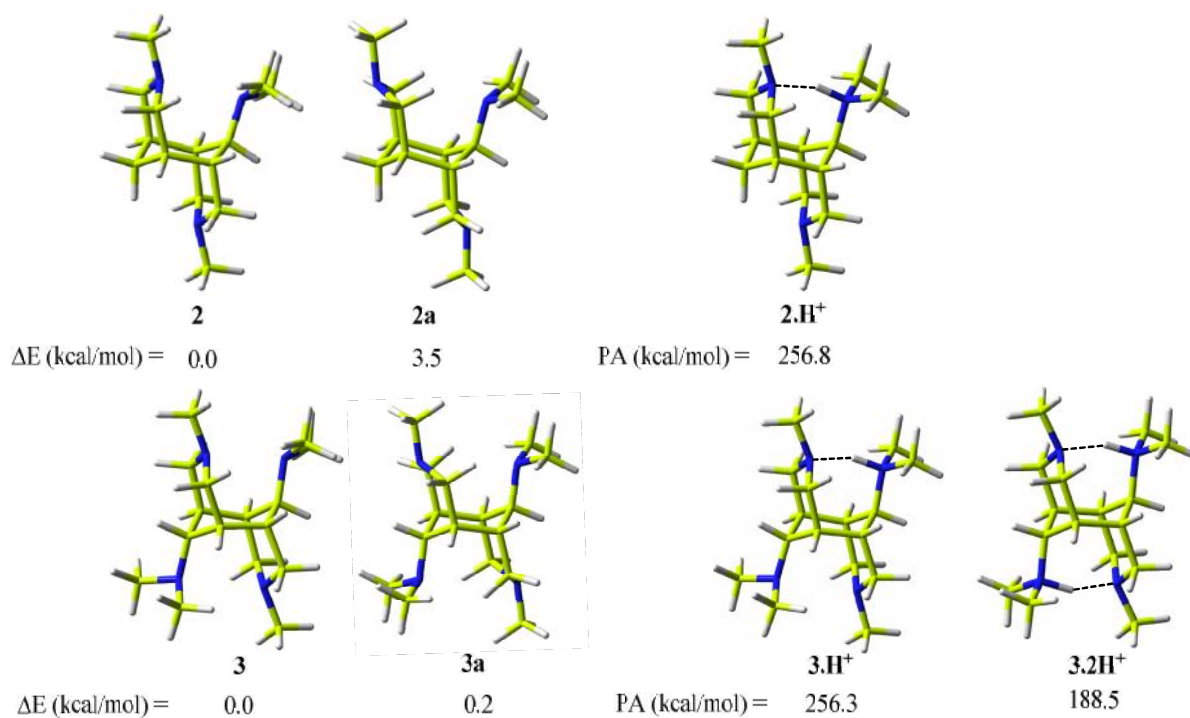

**Fig. S4** B3LYP/6-31+G\* calculated geometries for different conformations of **2** and **3**, relative energies (kcal/mol), and protonated forms of their most stable conformer. Proton affinity values (PA) were calculated at B3LYP/6-311+G\*\*//B3LYP/6-31+G\* level of theory with zero point vibrational energy correction. [Green-yellow = carbon; blue = nitrogen; and white = hydrogen].



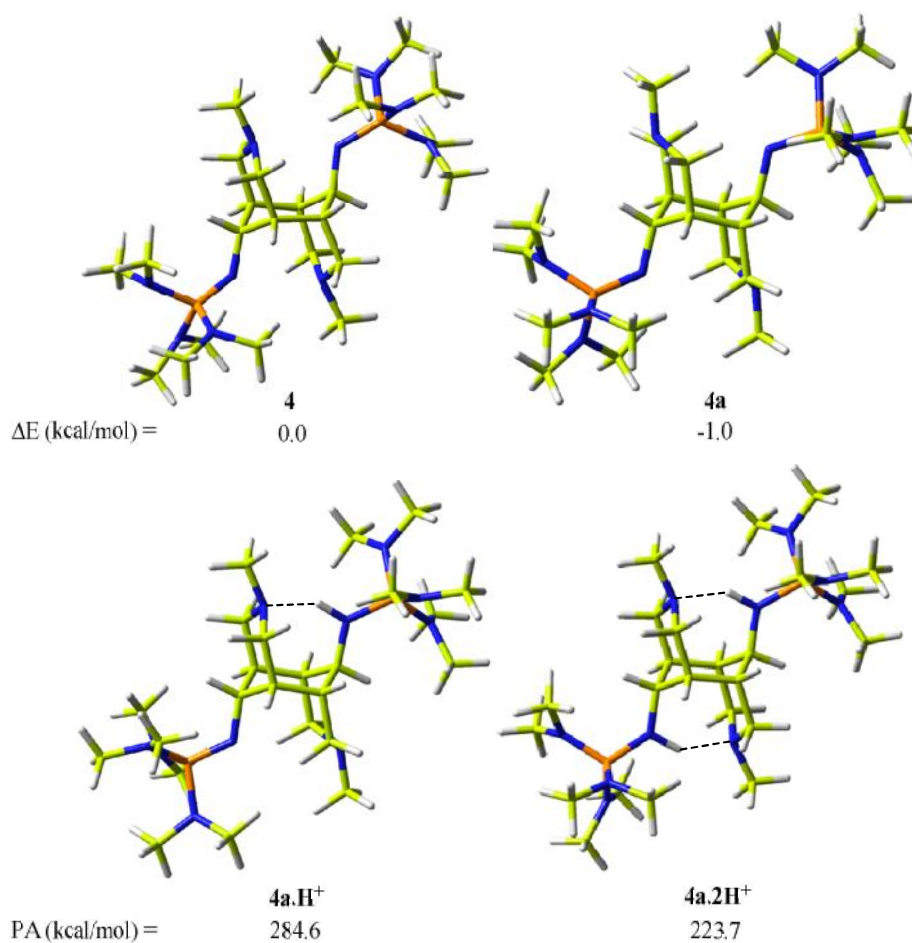

**Fig. S5** B3LYP/6-31+G\* calculated geometries for different conformations of **4**, relative energies (kcal/mol), and protonated forms of their most stable conformer **4a**. Proton affinity values (PA) were calculated at B3LYP/6-311+G\*\*//B3LYP/6-31+G\* level of theory with zero point vibrational energy correction. [Green-yellow = carbon; blue = nitrogen; orange = phosphorus; and white = hydrogen]

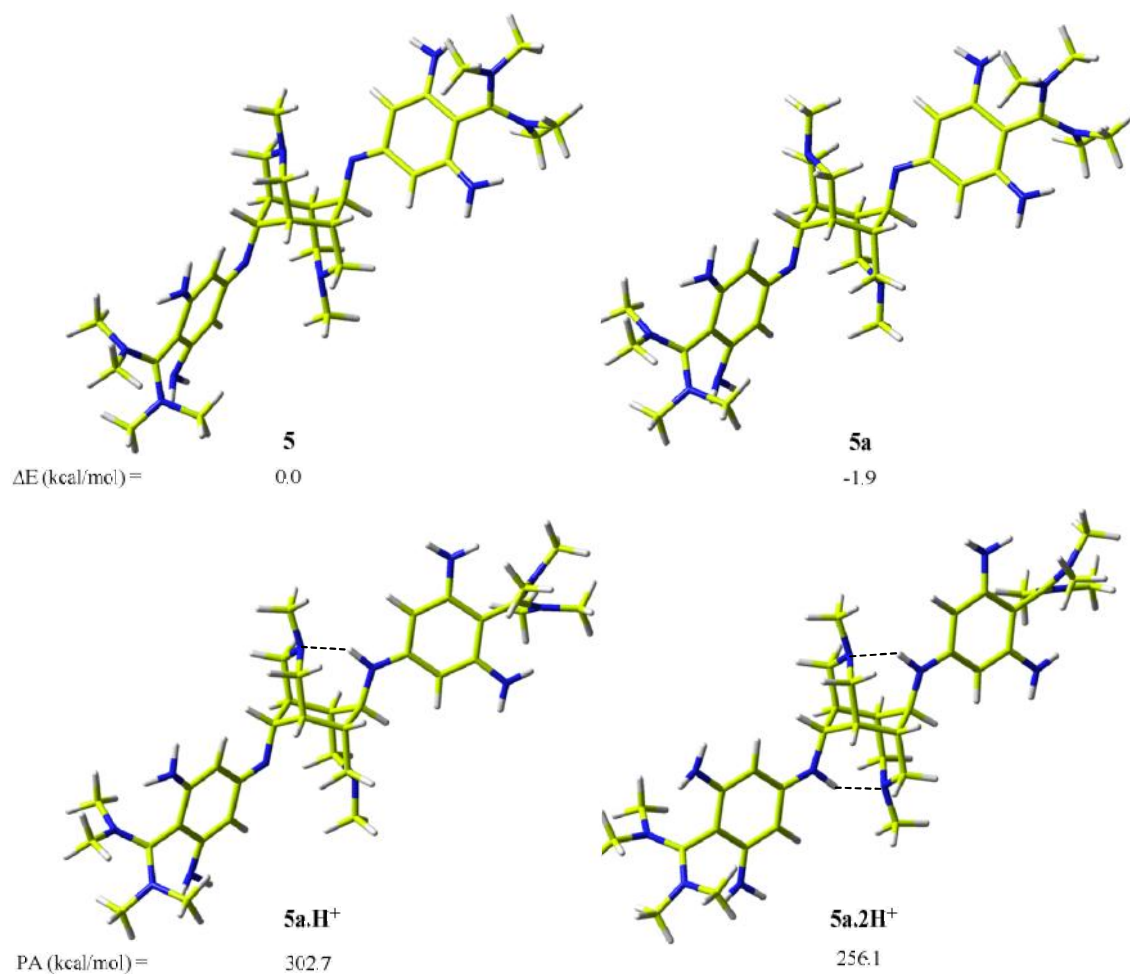

**Fig. S6** B3LYP/6-31+G\* calculated geometries for different conformations of **5**, relative energies (kcal/mol), and protonated forms of their most stable conformer **5a**. Proton affinity values (PA) were calculated at B3LYP/6-311+G\*\*//B3LYP/6-31+G\* level of theory with zero point vibrational energy correction. [Green-yellow = carbon; blue = nitrogen; and white = hydrogen].

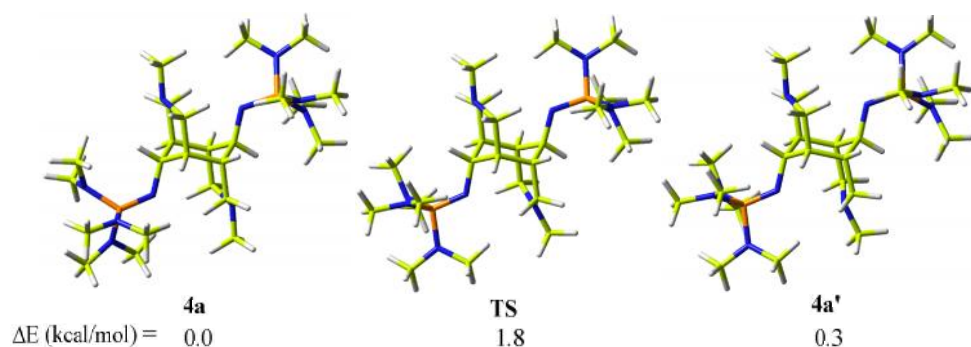

**Fig. S7** B3LYP/6-31+G\* calculated relative energies (kcal/mol) for the flipping of piperidine ring from boat form (**4a**) to chair form (**4a'**) [Green-yellow = carbon; blue = nitrogen; orange = phosphorus; and white = hydrogen]

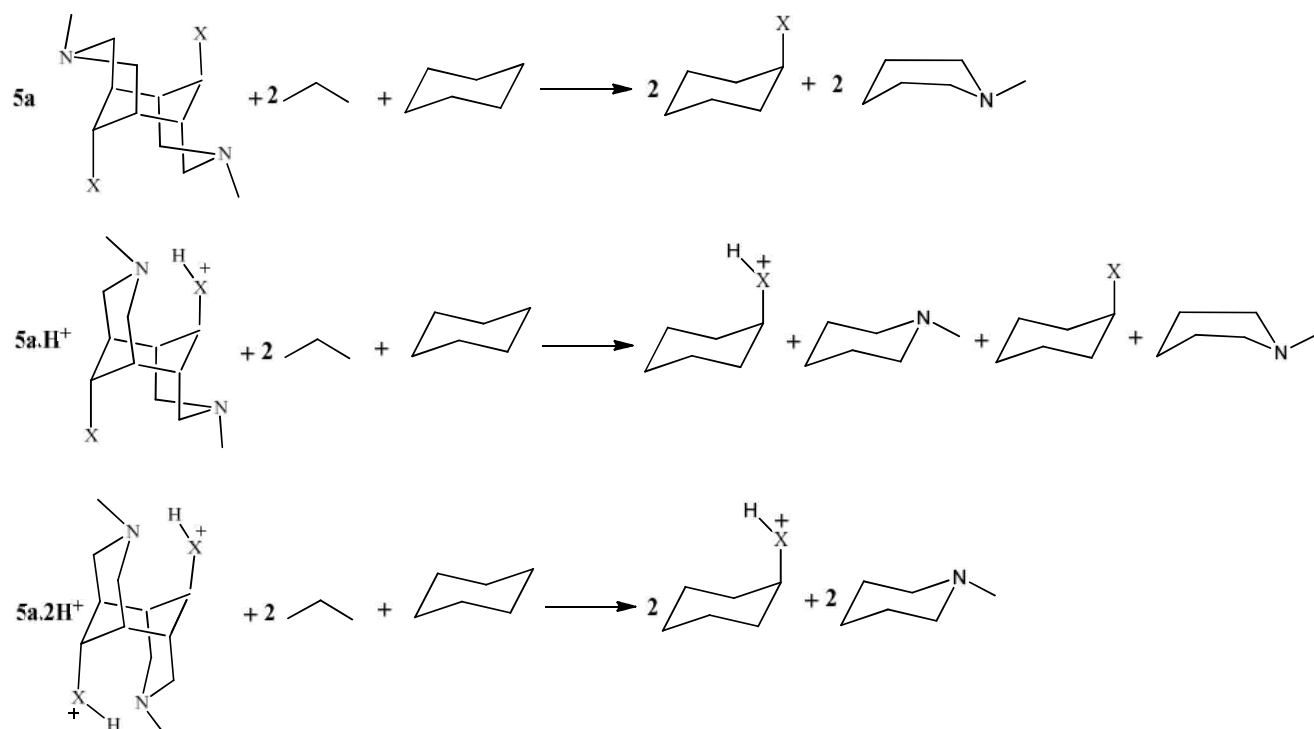

**Fig. S8** Isodesmic reactions used to obtain strain energy of unprotonated bases and the sum of the cation strain and the H-bond energies (SE+HB)<sup>+</sup> for their corresponding protonated cations.

**Table S3** Strain energies (SE) for the unprotonated bases **5a** and Hydrogen bond + Strain Energies (HB+SE)<sup>+</sup> and Hydrogen bond energies (HB) for their monoprotated and bis-protonated cations (all in kcal/mol).

| Compounds | SE   | (HB+SE) <sup>+</sup> |                | HB             |                |
|-----------|------|----------------------|----------------|----------------|----------------|
|           |      | monoprotonated       | bis-protonated | monoprotonated | bis-protonated |
| <b>5a</b> | 16.9 | 3.0                  | 36.9           | -5.8           | -5.1           |

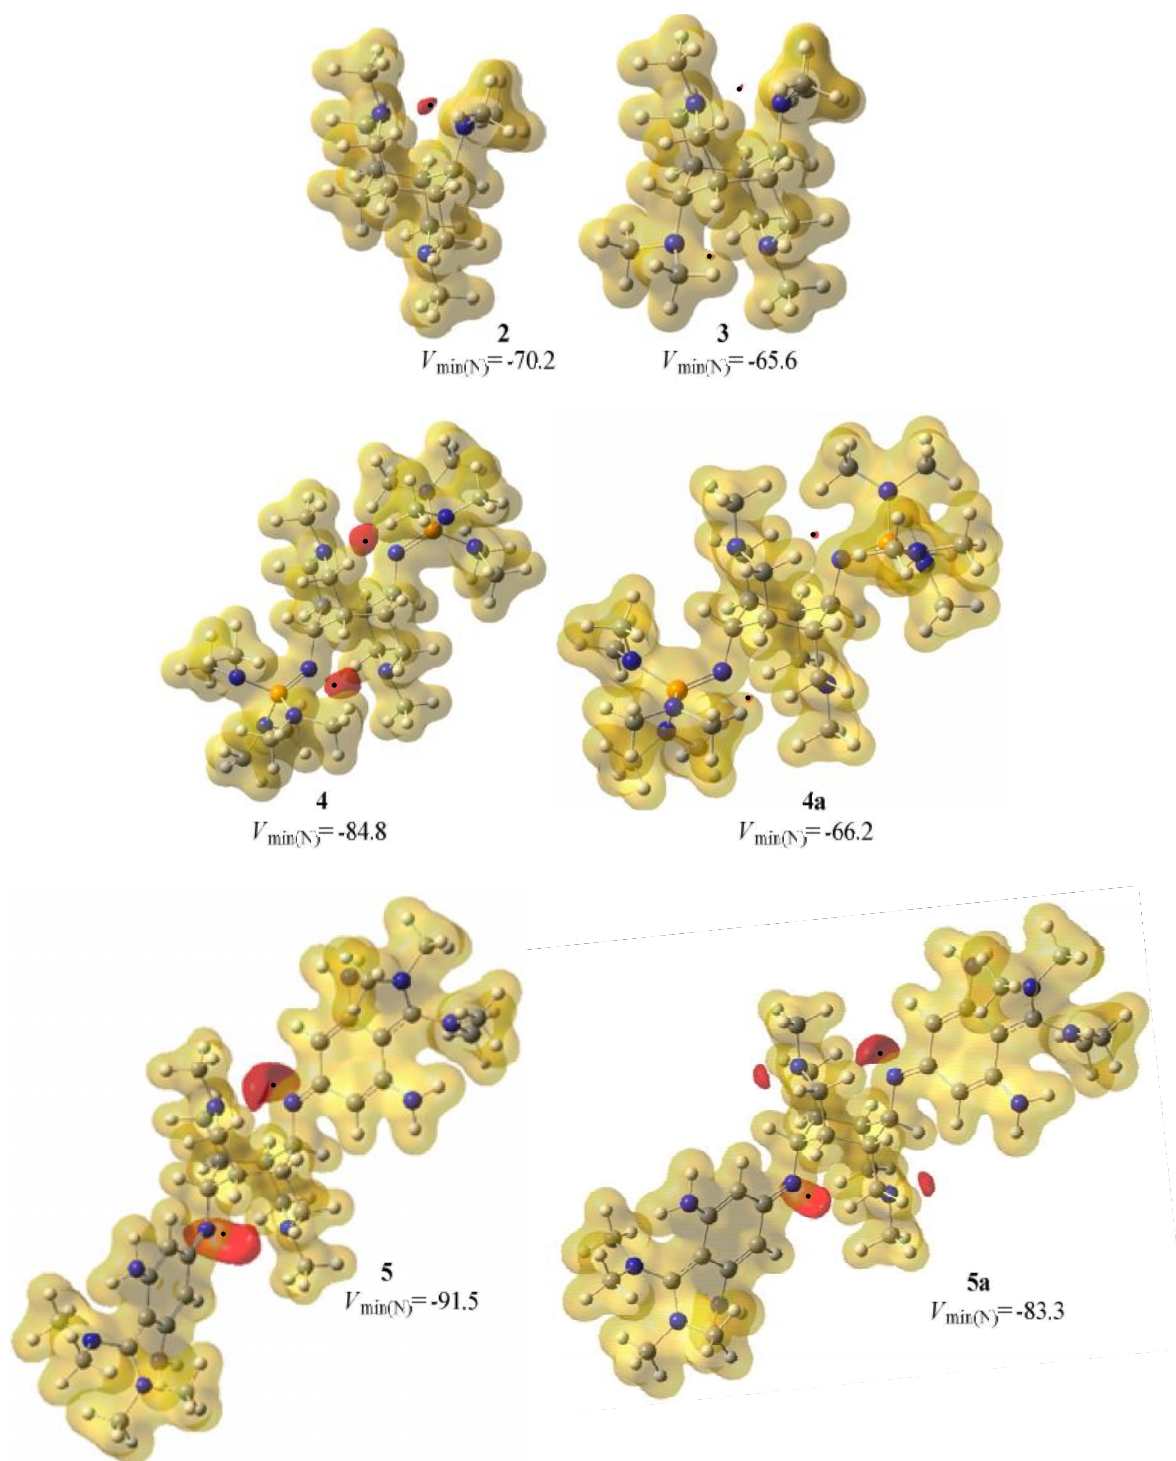

**Fig. S9** Molecular electrostatic isopotential surfaces of compounds **2-5** and **4a-5a** at isosurface value of -0.104 au. The black dot represents the location of the  $V_{\min}$  point in each case and is given in kcal/mol.

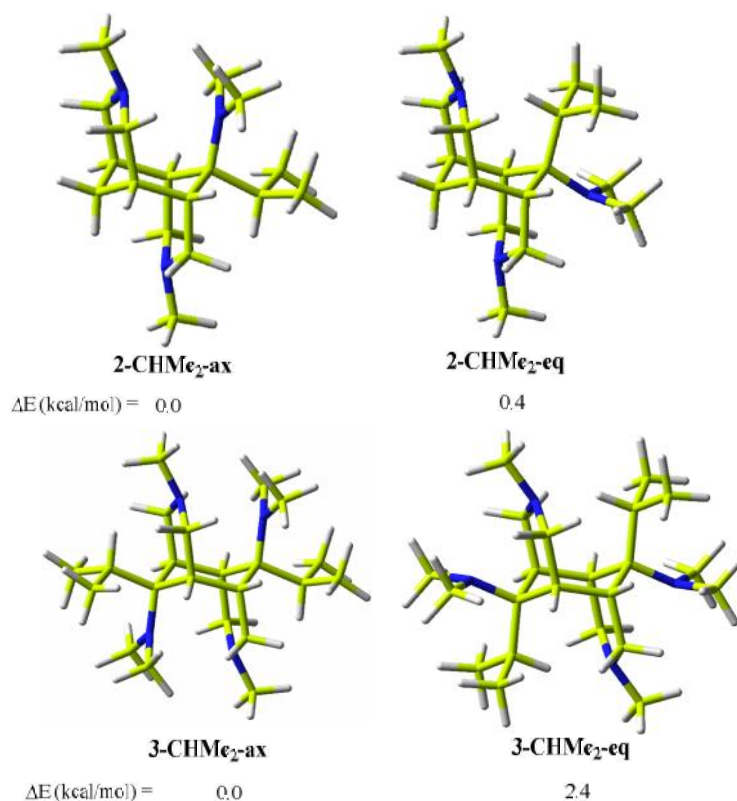

**Fig. S10** B3LYP/6-31+G\* optimized geometries of **2** and **3** with isopropyl substitution and their corresponding relative energies. [Green-yellow = carbon; blue = nitrogen; and white = hydrogen].

**Table S4** B3LYP/6-311+G\*\*//B3LYP/6-31+G\* calculated p*K*<sub>a</sub>(MeCN) and gas phase proton affinities (kcal/mol) of amino and imino bases. Experimental<sup>a</sup> p*K*<sub>a</sub>(MeCN) values are given in parenthesis.

| Compounds  | p <i>K</i> <sub>a</sub> | Gas phase Proton affinity (PA) <sup>b</sup> |
|------------|-------------------------|---------------------------------------------|
| <b>I</b>   | 22.1 (21.6)             | 243.3                                       |
| <b>II</b>  | 19.2 (20.0)             | 238.5                                       |
| <b>III</b> | 25.9 (25.4)             | 254.8                                       |
| <b>IV</b>  | 24.3 (24.3)             | 251.0                                       |
| <b>V</b>   | 26.6 (26.0)             | 253.1                                       |
| <b>VI</b>  | 22.2 (23.3)             | 247.0                                       |

<sup>a</sup> ref. 19, <sup>b</sup> Zero point vibrational energy corrected.

19 (a) I. Kaljurand, A. Kütt, L. Sooväli, T. Rodima, V. Mäemets, I. Leito and I. A. Koppel, *J. Org. Chem.*, 2005, 70, 1019; (b) E. Rõõm, A. Kütt, I. Kaljurand, I. Koppel, I. Leito, I. A. Koppel, M. Mishima, K. Goto and Y. Miyahara, *Chem. Eur. J.*, 2007, 13, 7631.

### Thermodynamics of the capture of CO<sub>2</sub>

The thermodynamics of binding are critical for designing a system that can efficiently capture CO<sub>2</sub>. We have calculated the thermodynamic data for CO<sub>2</sub> capture with the designed superbase **4a** using propylcarbonic acid as reported (Fig. S11, ESI†).<sup>20</sup> The calculations have been performed with B3LYP/6-31+G\* level of theory. The reliability of the method employed in this study has been examined with variety of simple amidine or guanidine base and propylcarbonic acid, because their experimental results are known. The computed free energy ( $\Delta G$ ) value for these system are found to be in good agreement with the experimental data available (Table S5, ESI†). The binding of propylcarbonic acid with the designed superbase (**4a**) containing two capturing sites was examined. The sequential free energy of binding of acid with **4a** is given in Table S5, ESI†. The thermodynamic data suggest that the compound **4a** binds much strongly at both ends to stabilize the propylcarbonate anions compare to the reported DBU, TMG and Barton's base. The extra stabilization comes from the delocalization of the superbase in protonated form due to cation resonance effect.

20 (a) D. J. Heldebrant, C. R. Yonker, P. G. Jessop and L. Phan, *Energy Environ. Sci.*, 2008, **1**, 487; (b) Z. Yang, L. He, Y. Zhao, B. Li and B. Yu, *Energy Environ. Sci.*, 2011, **4**, 3971.

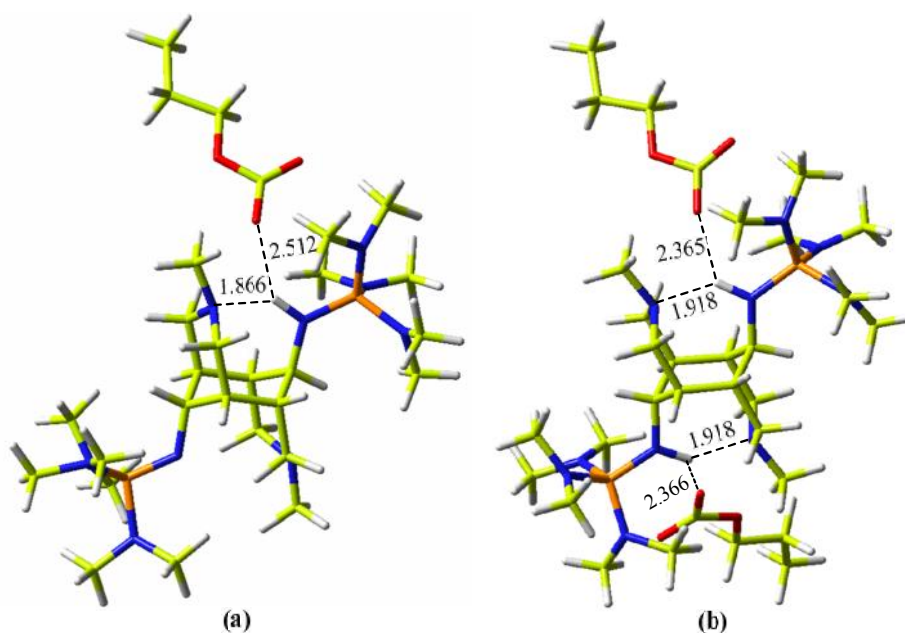

**Fig. S11** B3LYP/6-31+G\* optimized geometry of propylcarbonate salt made from superbase **4a** (a) 1<sup>st</sup> site, (b) 2<sup>nd</sup> site [distances are given in Å]. [Green-yellow = carbon; blue = nitrogen; orange = phosphorus; red = oxygen; and white = hydrogen].

**Table S5** Thermodynamics of the capture of CO<sub>2</sub> by different organic bases in acetonitrile solvent.

| Base/alcohol pair | $\Delta G/\text{kcal mol}^{-1}$ |                |
|-------------------|---------------------------------|----------------|
|                   | Experimental <sup>a</sup>       | Calculated     |
| DBU/PrOH          | -1.9                            | -6.7           |
| TMG/PrOH          | 0.6                             | -3.5           |
| Barton's/PrOH     | -2.2                            | -6.5           |
| <b>4a</b> /PrOH   | -                               | -10.3 (-11.5)* |

<sup>a</sup> Ref 20a.

\*The 1<sup>st</sup> and 2<sup>nd</sup> free energies of binding of propylcarbonic acid with **4a** are given, where the 2<sup>nd</sup> value is given in ( ).

**B3LYP/6-31+G\* SCF energies in gas phase (E), B3LYP/6-31+G\* zero point vibrational energies (ZPVE), and Cartesian coordinates for 1-5, 1a-5a and protonated forms. B3LYP/6-31+G\*\*//B3LYP/6-31+G\* SCF energies in gas phase are given in ( ). (All energies are given in Hartree).**

**1**

E = -541.90549 (-542.03627)

ZPVE = 0.325450

|   |             |             |             |
|---|-------------|-------------|-------------|
| C | 1.50055882  | 1.59024510  | -0.97614706 |
| C | 0.11455882  | 1.19424510  | -1.50414706 |
| C | -0.95644118 | 1.56024510  | -0.45314706 |
| C | -0.74844118 | 0.97024510  | 0.96885294  |
| C | 0.76355882  | 0.94824510  | 1.34285294  |
| C | 1.80055882  | 0.68124510  | 0.22385294  |
| C | 0.14955882  | -0.28475490 | -1.93714706 |
| N | -1.51144118 | -0.29775490 | 1.10885294  |
| C | 1.87855882  | -0.76775490 | -0.27814706 |
| N | 0.63255882  | -1.18975490 | -0.89814706 |
| C | 0.67355882  | -2.56575490 | -1.35514706 |
| C | -0.99844118 | -1.26475490 | 2.06585294  |
| C | -2.91344118 | -0.01375490 | 1.38985294  |
| H | -0.11544118 | 1.77324510  | -2.41014706 |
| H | -1.94744118 | 1.27224510  | -0.82314706 |
| H | -1.19644118 | 1.68724510  | 1.68585294  |
| H | 0.94355882  | 0.28524510  | 2.19585294  |
| H | 2.78855882  | 0.92824510  | 0.63885294  |
| H | 2.26555882  | 1.46024510  | -1.75514706 |
| H | -0.85644118 | -0.61575490 | -2.22714706 |
| H | 0.78855882  | -0.35575490 | -2.84714706 |
| H | 2.73855882  | -0.84675490 | -0.98314706 |
| H | 2.09455882  | -1.45275490 | 0.55385294  |
| H | 0.95855882  | -3.22575490 | -0.52714706 |
| H | -0.31844118 | -2.86975490 | -1.70714706 |
| H | -1.67544118 | -2.12675490 | 2.08585294  |
| H | -0.01644118 | -1.62675490 | 1.75685294  |

|   |             |             |             |
|---|-------------|-------------|-------------|
| H | -3.49444118 | -0.94275490 | 1.35285294  |
| H | -3.32944118 | 0.66824510  | 0.64285294  |
| H | 1.51455882  | 2.64824510  | -0.68114706 |
| H | -0.96244118 | 2.65724510  | -0.37414706 |
| H | 0.98455882  | 1.95924510  | 1.71485294  |
| H | 1.39655882  | -2.72475490 | -2.18314706 |
| H | -0.92744118 | -0.87475490 | 3.10285294  |
| H | -3.06644118 | 0.44924510  | 2.38885294  |

**1.H<sup>+</sup>**

E = -542.32251 (-542.45550)

ZPVE = 0.341256

|   |             |             |             |
|---|-------------|-------------|-------------|
| C | 1.61238835  | 1.54300971  | -0.93633010 |
| C | 0.20538835  | 1.25200971  | -1.48033010 |
| C | -0.84761165 | 1.68100971  | -0.42733010 |
| C | -0.69061165 | 1.05100971  | 0.97766990  |
| C | 0.79938835  | 1.06700971  | 1.39666990  |
| C | 1.81238835  | 0.65200971  | 0.29966990  |
| C | 0.14338835  | -0.22499029 | -1.91733010 |
| N | -1.29661165 | -0.36199029 | 1.04866990  |
| C | 1.74638835  | -0.82199029 | -0.14233010 |
| N | 0.46638835  | -1.16499029 | -0.81333010 |
| C | 0.47438835  | -2.55799029 | -1.29033010 |
| C | -1.14961165 | -1.00299029 | 2.39366990  |
| C | -2.73661165 | -0.41099029 | 0.63966990  |
| H | 0.01938835  | 1.85100971  | -2.37933010 |
| H | -1.86261165 | 1.56000971  | -0.81533010 |
| H | -1.27461165 | 1.63100971  | 1.70066990  |
| H | 0.96738835  | 0.50500971  | 2.31966990  |
| H | 2.81438835  | 0.80900971  | 0.71666990  |
| H | 2.37238835  | 1.32400971  | -1.69633010 |
| H | -0.85261165 | -0.48599029 | -2.29633010 |
| H | 0.85138835  | -0.37199029 | -2.75033010 |
| H | 2.58938835  | -1.01999029 | -0.82533010 |
| H | 1.86438835  | -1.49999029 | 0.71266990  |
| H | 0.66038835  | -3.23499029 | -0.45033010 |
| H | -0.49561165 | -2.80399029 | -1.73133010 |
| H | -1.67061165 | -1.96199029 | 2.38166990  |

|   |             |             |             |
|---|-------------|-------------|-------------|
| H | -0.10061165 | -1.17699029 | 2.61966990  |
| H | -3.10661165 | -1.42599029 | 0.78766990  |
| H | -2.84361165 | -0.14799029 | -0.41033010 |
| H | 1.71738835  | 2.60300971  | -0.67433010 |
| H | -0.72961165 | 2.76200971  | -0.27533010 |
| H | 1.01538835  | 2.11100971  | 1.65766990  |
| H | 1.25438835  | -2.72299029 | -2.04933010 |
| H | -1.59161165 | -0.35799029 | 3.15766990  |
| H | -3.31561165 | 0.28200971  | 1.25666990  |
| H | -0.68661165 | -0.90099029 | 0.31566990  |

**1a**

E = -541.91283 (-542.04320)

ZPVE = 0.32595

|   |             |             |             |
|---|-------------|-------------|-------------|
| C | 0.91664400  | 0.00087000  | 1.87629500  |
| C | 0.83875500  | 1.23678600  | 0.96654700  |
| C | -0.50720300 | 1.27309800  | 0.18034100  |
| C | -1.37108300 | 0.00022100  | 0.33822700  |
| C | -0.50730900 | -1.27286800 | 0.18167800  |
| C | 0.83876000  | -1.23583400 | 0.96771800  |
| C | 2.05059500  | 1.21215700  | 0.01647000  |
| C | 2.05064100  | -1.21204700 | 0.01772200  |
| N | 2.06517800  | -0.00036400 | -0.79829800 |
| C | 3.14990400  | -0.00083700 | -1.76611600 |
| H | 0.92648000  | 2.14617800  | 1.57505200  |
| H | 0.92654300  | -2.14471600 | 1.57698000  |
| H | 1.86393100  | 0.00112000  | 2.43375500  |
| H | 2.01637900  | 2.07631300  | -0.65982600 |
| H | 2.98316500  | 1.30413400  | 0.61581900  |
| H | 2.98318300  | -1.30333100 | 0.61723700  |
| H | 2.01651000  | -2.07690700 | -0.65767100 |
| H | 3.07792800  | -0.88874200 | -2.40462200 |
| H | 3.07747200  | 0.88603500  | -2.40601200 |
| H | 0.11081700  | 0.00118900  | 2.62042600  |
| H | 4.15231800  | -0.00021800 | -1.28993400 |
| H | -0.30736700 | 1.40402500  | -0.89031200 |
| H | -1.08067000 | 2.14429300  | 0.51267400  |
| H | -0.30756800 | -1.40522900 | -0.88882800 |
| H | -1.08079600 | -2.14363000 | 0.51514900  |
| H | -1.79794400 | 0.00073500  | 1.36437600  |
| N | -2.49149700 | -0.00016600 | -0.62877500 |
| C | -3.33020600 | 1.19233300  | -0.52302700 |
| H | -2.76962000 | 2.09192700  | -0.78615700 |
| H | -4.16305100 | 1.10641400  | -1.22843200 |
| H | -3.75625200 | 1.33090700  | 0.49279100  |
| C | -3.32960100 | -1.19305800 | -0.52282900 |
| H | -4.16234600 | -1.10772800 | -1.22841700 |
| H | -2.76848700 | -2.09241600 | -0.78562400 |
| H | -3.75578400 | -1.33158500 | 0.49294900  |

**1a.H<sup>+</sup>**

E = -542.30259 (-542.43540)

ZPVE = 0.34228

|   |            |            |            |
|---|------------|------------|------------|
| C | 1.02723400 | 0.00056900 | 1.90987800 |
|---|------------|------------|------------|

|   |             |             |             |
|---|-------------|-------------|-------------|
| C | 0.92000000  | 1.24049400  | 1.00833800  |
| C | -0.46674600 | 1.29537400  | 0.29458300  |
| C | -1.28804600 | 0.00019600  | 0.45167800  |
| C | -0.46679300 | -1.29509400 | 0.29531600  |
| C | 0.91994400  | -1.23987500 | 1.00906000  |
| C | 2.06268000  | 1.20583300  | -0.02340300 |
| C | 2.06263300  | -1.20586700 | -0.02269000 |
| N | 1.97832700  | -0.00025900 | -0.84874700 |
| C | 2.97259500  | -0.00059400 | -1.92178900 |
| H | 1.03768700  | 2.14845100  | 1.60962200  |
| H | 1.03757900  | -2.14749200 | 1.61086700  |
| H | 1.99383600  | 0.00069700  | 2.42728200  |
| H | 2.00429400  | 2.08145900  | -0.68167000 |
| H | 3.03144100  | 1.26649700  | 0.51114900  |
| H | 3.03138600  | -1.26625400 | 0.51190800  |
| H | 2.00421800  | -2.08187800 | -0.68044100 |
| H | 2.83792700  | -0.88795900 | -2.54885600 |
| H | 2.83796200  | 0.88641000  | -2.54937300 |
| H | 0.25671400  | 0.00081300  | 2.69228300  |
| H | 4.01009000  | -0.00050300 | -1.54105100 |
| H | -0.30177800 | 1.48434600  | -0.77526300 |
| H | -1.04128300 | 2.13679300  | 0.69388700  |
| H | -0.30182000 | -1.48466700 | -0.77442200 |
| H | -1.04138000 | -2.13626900 | 0.69506800  |
| H | -1.80738000 | 0.00046700  | 1.41626500  |
| N | -2.44432700 | -0.00014600 | -0.58146700 |
| C | -3.30852800 | 1.23163400  | -0.51203200 |
| H | -2.71030900 | 2.11397700  | -0.72927300 |
| H | -4.10808300 | 1.13778500  | -1.24843300 |
| H | -3.73253700 | 1.29925400  | 0.49158600  |
| C | -3.30827500 | -1.23206000 | -0.51137400 |
| H | -4.10783000 | -1.13878900 | -1.24784900 |
| H | -2.70985400 | -2.11439400 | -0.72810600 |
| H | -3.73229200 | -1.29921000 | 0.49227100  |
| H | -1.98678200 | -0.00035700 | -1.50133800 |

**2**

E = -713.96485 (-714.13469)

ZPVE = 0.40666

|   |             |             |             |
|---|-------------|-------------|-------------|
| C | 1.29163636  | 0.72291667  | -1.45230303 |
| C | -0.20336364 | 0.44691667  | -1.65730303 |
| C | -1.03236364 | 0.87491667  | -0.40730303 |
| C | -0.70636364 | 0.06491667  | 0.86669697  |
| C | 0.83963636  | 0.18191667  | 1.01969697  |
| C | 1.71363636  | -0.12808333 | -0.24230303 |
| C | -0.33536364 | -1.03708333 | -2.07330303 |
| C | -0.82536364 | 2.35691667  | -0.01430303 |
| N | -1.38036364 | -1.24808333 | 0.92669697  |
| C | 1.04963636  | 1.64691667  | 1.48469697  |
| C | 1.69163636  | -1.58808333 | -0.72530303 |
| N | 0.49963636  | 2.63891667  | 0.55469697  |
| C | 0.59363636  | 3.98891667  | 1.07769697  |
| N | 0.38163636  | -1.97808333 | -1.21530303 |
| C | 0.33663636  | -3.32908333 | -1.72330303 |



|   |             |             |             |
|---|-------------|-------------|-------------|
| C | -0.75936364 | -2.19908333 | 1.83569697  |
| C | -2.78436364 | -1.07708333 | 1.28369697  |
| H | -0.58036364 | 1.03891667  | -2.50430303 |
| H | -2.09436364 | 0.76891667  | -0.65930303 |
| H | -1.10536364 | 0.64291667  | 1.72769697  |
| H | 1.19263636  | -0.44908333 | 1.84469697  |
| H | 2.75263636  | 0.09991667  | 0.03269697  |
| H | -0.95136364 | 3.01091667  | -0.88930303 |
| H | 2.12263636  | 1.85991667  | 1.59069697  |
| H | 1.62763636  | 4.20591667  | 1.36869697  |
| H | 0.29963636  | 4.70991667  | 0.30569697  |
| H | -0.05436364 | 4.15491667  | 1.96469697  |
| H | 1.85563636  | 0.40191667  | -2.34030303 |
| H | -1.63036364 | 2.62691667  | 0.70169697  |
| H | 0.60463636  | 1.75091667  | 2.49669697  |
| H | -1.38936364 | -1.34508333 | -2.08430303 |
| H | 0.03263636  | -1.10608333 | -3.12130303 |
| H | 2.48163636  | -1.68908333 | -1.50430303 |
| H | 1.97163636  | -2.28108333 | 0.08269697  |
| H | -0.70436364 | -3.62808333 | -1.90030303 |
| H | 0.89363636  | -3.45508333 | -2.67830303 |
| H | 0.76863636  | -4.02208333 | -0.99030303 |
| H | -1.35436364 | -3.11908333 | 1.84769697  |
| H | 0.24363636  | -2.46008333 | 1.49469697  |
| H | -0.69336364 | -1.82908333 | 2.88069697  |
| H | -3.29236364 | -2.04708333 | 1.24269697  |
| H | -2.92336364 | -0.65808333 | 2.30369697  |
| H | -3.28936364 | -0.40908333 | 0.57969697  |
| H | 1.48963636  | 1.78191667  | -1.29230303 |

### 2.H<sup>+</sup>

E = -714.38692 (-714.55941)

ZPVE = 0.422193

|   |             |             |             |
|---|-------------|-------------|-------------|
| C | 1.42712030  | 0.68464662  | -1.33644361 |
| C | -0.06587970 | 0.50364662  | -1.65044361 |
| C | -0.96387970 | 0.92164662  | -0.43844361 |
| C | -0.69987970 | 0.12464662  | 0.86155639  |
| C | 0.82312030  | 0.22864662  | 1.11455639  |
| C | 1.71312030  | -0.18735338 | -0.10344361 |
| C | -0.24387970 | -0.95135338 | -2.13544361 |
| C | -0.76487970 | 2.40264662  | -0.01544361 |
| N | -1.27087970 | -1.29235338 | 0.88455639  |
| C | 1.03012030  | 1.70664662  | 1.54455639  |
| C | 1.57212030  | -1.65635338 | -0.55744361 |
| N | 0.55412030  | 2.66964662  | 0.55355639  |
| C | 0.69212030  | 4.04764662  | 1.01055639  |
| N | 0.24012030  | -1.96135338 | -1.15144361 |
| C | 0.21112030  | -3.31735338 | -1.72444361 |
| C | -0.97687970 | -2.01235338 | 2.16155639  |
| C | -2.74287970 | -1.32735338 | 0.62855639  |
| H | -0.35687970 | 1.14464662  | -2.49144361 |
| H | -2.01387970 | 0.84564662  | -0.74144361 |
| H | -1.22387970 | 0.62364662  | 1.68655639  |
| H | 1.12012030  | -0.36935338 | 1.98255639  |

|   |             |             |             |
|---|-------------|-------------|-------------|
| H | 2.75612030  | -0.06335338 | 0.21355639  |
| H | -0.89387970 | 3.05564662  | -0.88744361 |
| H | 2.09812030  | 1.89564662  | 1.71155639  |
| H | 1.72812030  | 4.23664662  | 1.30955639  |
| H | 0.44412030  | 4.73464662  | 0.19455639  |
| H | 0.03512030  | 4.27964662  | 1.87055639  |
| H | 2.03112030  | 0.33864662  | -2.18544361 |
| H | -1.57987970 | 2.65964662  | 0.69455639  |
| H | 0.52812030  | 1.84264662  | 2.52555639  |
| H | -1.29387970 | -1.18835338 | -2.35144361 |
| H | 0.30812030  | -1.06135338 | -3.08244361 |
| H | 2.36312030  | -1.85935338 | -1.29544361 |
| H | 1.72412030  | -2.36035338 | 0.27155639  |
| H | -0.79887970 | -3.54735338 | -2.07844361 |
| H | 0.90812030  | -3.41435338 | -2.57044361 |
| H | 0.49012030  | -4.04835338 | -0.95944361 |
| H | -1.44687970 | -2.99635338 | 2.12355639  |
| H | 0.09612030  | -2.13835338 | 2.28755639  |
| H | -1.38287970 | -1.44735338 | 3.00555639  |
| H | -3.08487970 | -2.36135338 | 0.69755639  |
| H | -3.26187970 | -0.72135338 | 1.37755639  |
| H | -2.96287970 | -0.94735338 | -0.36644361 |
| H | 1.67212030  | 1.72864662  | -1.15244361 |
| H | -0.72987970 | -1.78135338 | 0.04455639  |

### 2a

E = -713.95930

|   |             |             |             |
|---|-------------|-------------|-------------|
| C | -0.01916500 | -2.01504800 | 0.00003600  |
| C | 0.27712200  | -1.14322300 | 1.22654700  |
| C | -0.64575500 | 0.11359700  | 1.22809900  |
| C | -0.45735300 | 1.04457000  | -0.00005700 |
| C | -0.64578900 | 0.11334600  | -1.22819500 |
| C | 0.27716900  | -1.14342400 | -1.22662000 |
| N | 0.77932400  | 1.86334600  | -0.00016900 |
| N | -2.85163900 | -0.00519500 | 0.00008900  |
| C | -4.22001900 | -0.48017500 | 0.00008800  |
| N | 2.46509500  | -1.23723300 | 0.00000900  |
| C | 3.87690500  | -0.90832400 | -0.00001900 |
| C | 0.85748300  | 2.71725300  | -1.18553900 |
| C | 0.85839900  | 2.71673900  | 1.18551600  |
| H | 0.03146800  | -1.70099500 | 2.14082100  |
| H | -0.45269000 | 0.66446300  | 2.15376900  |
| H | -1.30973500 | 1.74964300  | -0.00002000 |
| H | -0.45294200 | 0.66418400  | -2.15393400 |
| H | 0.03167600  | -1.70144000 | -2.14080300 |
| H | -4.74486300 | -0.10570400 | -0.88705000 |
| H | -4.29621400 | -1.58797800 | -0.00081700 |
| H | -4.74430700 | -0.10718800 | 0.88817500  |
| H | 0.61212900  | -2.90903500 | 0.00004200  |
| H | 4.06920000  | 0.18428100  | -0.00064300 |
| H | 4.35832900  | -1.33626700 | 0.88804600  |
| H | 4.35867900  | -1.33739500 | -0.88734700 |
| H | 1.73871400  | 3.36187500  | -1.10520200 |
| H | 0.96900900  | 2.12625600  | -2.09768200 |

|   |             |             |             |
|---|-------------|-------------|-------------|
| H | -0.03453100 | 3.36657900  | -1.30231800 |
| H | 1.73972300  | 3.36121600  | 1.10497200  |
| H | -0.03338700 | 3.36624000  | 1.30318800  |
| H | 0.97040100  | 2.12544300  | 2.09738600  |
| H | -1.05849700 | -2.35740900 | 0.00007800  |
| C | 1.80422500  | -0.83156000 | 1.24719200  |
| H | 1.98347400  | 0.23095000  | 1.47401200  |
| H | 2.28152800  | -1.41292200 | 2.04796400  |
| C | 1.80428700  | -0.83173000 | -1.24726900 |
| H | 2.28167100  | -1.41311400 | -2.04799300 |
| H | 1.98367500  | 0.23070600  | -1.47410500 |
| C | -2.15110100 | -0.30597800 | -1.25152800 |
| H | -2.67692500 | 0.25048100  | -2.03889700 |
| H | -2.23488800 | -1.37583400 | -1.52698000 |
| C | -2.15113200 | -0.30580200 | 1.25169500  |
| H | -2.23477300 | -1.37562000 | 1.52718800  |
| H | -2.67704500 | 0.25070700  | 2.03894900  |

### 3

E = -847.90783 (-848.11073)

ZPVE = 0.479660

|   |             |             |             |
|---|-------------|-------------|-------------|
| C | 0.92717308  | 0.35280769  | -1.26544872 |
| C | -0.59182692 | 0.10680769  | -1.33044872 |
| C | -1.34982692 | 0.55280769  | -0.04244872 |
| C | -1.03382692 | -0.31619231 | 1.18855128  |
| C | 0.51917308  | -0.21919231 | 1.31855128  |
| C | 1.37117308  | -0.42319231 | 0.01255128  |
| N | 1.32417308  | 1.75880769  | -1.49444872 |
| C | -0.74582692 | -1.38919231 | -1.70644872 |
| C | -1.08482692 | 2.01180769  | 0.41155128  |
| N | -1.73282692 | -1.61919231 | 1.20655128  |
| C | 0.73217308  | 1.17980769  | 1.93155128  |
| C | 1.36817308  | -1.89519231 | -0.45144872 |
| N | 0.20317308  | 2.22380769  | 1.07255128  |
| C | 2.65617308  | 2.08680769  | -1.00844872 |
| C | 1.23417308  | 2.07580769  | -2.91644872 |
| C | 0.32817308  | 3.55180769  | 1.62655128  |
| N | 0.04917308  | -2.31019231 | -0.89244872 |
| C | 0.00117308  | -3.66619231 | -1.38744872 |
| C | -1.12782692 | -2.60519231 | 2.08955128  |
| C | -3.13182692 | -1.42919231 | 1.57655128  |
| H | -1.02982692 | 0.67180769  | -2.16244872 |
| H | -2.41982692 | 0.50180769  | -0.27544872 |
| H | -1.41282692 | 0.23080769  | 2.07655128  |
| H | 0.89217308  | -0.93919231 | 2.05655128  |
| H | 2.40917308  | -0.18419231 | 0.27155128  |
| H | -1.12382692 | 2.69480769  | -0.44744872 |
| H | 1.80617308  | 1.37480769  | 2.07755128  |
| H | 3.45217308  | 1.44380769  | -1.44044872 |
| H | 2.88717308  | 3.12380769  | -1.27744872 |
| H | 2.69717308  | 2.01180769  | 0.07955128  |
| H | 1.45417308  | 3.13880769  | -3.06744872 |
| H | 1.94217308  | 1.48580769  | -3.53744872 |
| H | 0.22517308  | 1.88980769  | -3.29544872 |

|   |             |             |             |
|---|-------------|-------------|-------------|
| H | 1.35417308  | 3.71880769  | 1.97655128  |
| H | 0.10717308  | 4.30080769  | 0.85655128  |
| H | -0.35582692 | 3.73280769  | 2.48455128  |
| H | 1.38317308  | -0.21919231 | -2.09944872 |
| H | -1.92182692 | 2.28980769  | 1.08755128  |
| H | 0.27817308  | 1.18580769  | 2.94655128  |
| H | -1.79382692 | -1.70219231 | -1.61744872 |
| H | -0.46882692 | -1.47619231 | -2.77844872 |
| H | 2.14217308  | -2.01019231 | -1.24244872 |
| H | 1.67317308  | -2.55819231 | 0.37255128  |
| H | -1.04082692 | -3.98519231 | -1.50644872 |
| H | 0.51017308  | -3.79119231 | -2.36844872 |
| H | 0.48317308  | -4.34519231 | -0.67244872 |
| H | -1.74482692 | -3.51119231 | 2.08755128  |
| H | -0.13482692 | -2.88319231 | 1.73255128  |
| H | -1.04482692 | -2.25919231 | 3.14155128  |
| H | -3.65982692 | -2.38619231 | 1.51055128  |
| H | -3.25582692 | -1.03719231 | 2.60955128  |
| H | -3.62582692 | -0.73019231 | 0.89455128  |

### 3.H<sup>+</sup>

E = -848.32879 (-848.53435)

ZPVE = 0.494869

|   |             |             |             |
|---|-------------|-------------|-------------|
| C | 0.98652866  | 0.27068153  | -1.21631210 |
| C | -0.53747134 | 0.07468153  | -1.35131210 |
| C | -1.36947134 | 0.49468153  | -0.09431210 |
| C | -1.04847134 | -0.33231847 | 1.17268790  |
| C | 0.49852866  | -0.20131847 | 1.31768790  |
| C | 1.37952866  | -0.51731847 | 0.05668790  |
| N | 1.48852866  | 1.71368153  | -1.28331210 |
| C | -0.67947134 | -1.42131847 | -1.75831210 |
| C | -1.21247134 | 1.97068153  | 0.33668790  |
| N | -1.71547134 | -1.63831847 | 1.22368790  |
| C | 0.70052866  | 1.25368153  | 1.81468790  |
| C | 1.34052866  | -1.98731847 | -0.41531210 |
| N | 0.13652866  | 2.27868153  | 0.88968790  |
| C | 2.97552866  | 1.81068153  | -1.17731210 |
| C | 1.04052866  | 2.42468153  | -2.51931210 |
| C | 0.17152866  | 3.61868153  | 1.49768790  |
| N | 0.02752866  | -2.35331847 | -0.89431210 |
| C | -0.07947134 | -3.72931847 | -1.34131210 |
| C | -1.11147134 | -2.57831847 | 2.16168790  |
| C | -3.13247134 | -1.46631847 | 1.54968790  |
| H | -0.93147134 | 0.63668153  | -2.20631210 |
| H | -2.42247134 | 0.37268153  | -0.36931210 |
| H | -1.44447134 | 0.24468153  | 2.03568790  |
| H | 0.86552866  | -0.84131847 | 2.12668790  |
| H | 2.42052866  | -0.32431847 | 0.33968790  |
| H | -1.38347134 | 2.66268153  | -0.49831210 |
| H | 1.76652866  | 1.48568153  | 1.93468790  |
| H | 3.44152866  | 1.24568153  | -1.98931210 |
| H | 3.26352866  | 2.86068153  | -1.25331210 |
| H | 3.31452866  | 1.42068153  | -0.21931210 |
| H | 1.45752866  | 3.43268153  | -2.51331210 |

|   |             |             |             |
|---|-------------|-------------|-------------|
| H | 1.39952866  | 1.88768153  | -3.40231210 |
| H | -0.04547134 | 2.48968153  | -2.54731210 |
| H | 1.19352866  | 3.85868153  | 1.80768790  |
| H | -0.15747134 | 4.36568153  | 0.76768790  |
| H | -0.48447134 | 3.68168153  | 2.37868790  |
| H | 1.47352866  | -0.20131847 | -2.07931210 |
| H | -1.98547134 | 2.18868153  | 1.08868790  |
| H | 0.24052866  | 1.35168153  | 2.80868790  |
| H | -1.73947134 | -1.70031847 | -1.75231210 |
| H | -0.33247134 | -1.49631847 | -2.81131210 |
| H | 2.13952866  | -2.11131847 | -1.18131210 |
| H | 1.60952866  | -2.65731847 | 0.41068790  |
| H | -1.13347134 | -3.99231847 | -1.47831210 |
| H | 0.44952866  | -3.91531847 | -2.29731210 |
| H | 0.34152866  | -4.40031847 | -0.58531210 |
| H | -1.70847134 | -3.49431847 | 2.17768790  |
| H | -0.10347134 | -2.85131847 | 1.84368790  |
| H | -1.06447134 | -2.19031847 | 3.19968790  |
| H | -3.63047134 | -2.44031847 | 1.51868790  |
| H | -3.29147134 | -1.03031847 | 2.55768790  |
| H | -3.63247134 | -0.82131847 | 0.82168790  |
| H | 1.01952866  | 2.16768153  | -0.38831210 |

### 3.2H<sup>+</sup>

E = -848.64230 (-848.85030)

ZPVE = 0.510503

|   |             |             |             |
|---|-------------|-------------|-------------|
| C | 0.96915823  | 0.30049367  | -1.22911392 |
| C | -0.56884177 | 0.14449367  | -1.33311392 |
| C | -1.36084177 | 0.51649367  | -0.02811392 |
| C | -0.96884177 | -0.30050633 | 1.22888608  |
| C | 0.56815823  | -0.14450633 | 1.33188608  |
| C | 1.36115823  | -0.51650633 | 0.02688608  |
| N | 1.51015823  | 1.72349367  | -1.30611392 |
| C | -0.76284177 | -1.31950633 | -1.81011392 |
| C | -1.20384177 | 1.99249367  | 0.42388608  |
| N | -1.51084177 | -1.72250633 | 1.30588608  |
| C | 0.76315823  | 1.31849367  | 1.80988608  |
| C | 1.20315823  | -1.99250633 | -0.42411392 |
| N | 0.16415823  | 2.32049367  | 0.89388608  |
| C | 3.00715823  | 1.78049367  | -1.19811392 |
| C | 1.08315823  | 2.43949367  | -2.55511392 |
| C | 0.22015823  | 3.67849367  | 1.47488608  |
| N | -0.16484177 | -2.32050633 | -0.89311392 |
| C | -0.22184177 | -3.67950633 | -1.47311392 |
| C | -1.07984177 | -2.43950633 | 2.55288608  |
| C | -3.00684177 | -1.77950633 | 1.20088608  |
| H | -0.97884177 | 0.76149367  | -2.13811392 |
| H | -2.42484177 | 0.40349367  | -0.26111392 |
| H | -1.41984177 | 0.18349367  | 2.10188608  |
| H | 0.97815823  | -0.76250633 | 2.13688608  |
| H | 2.42415823  | -0.40350633 | 0.25988608  |
| H | -1.44584177 | 2.67549367  | -0.39911392 |
| H | 1.82915823  | 1.55349367  | 1.90888608  |
| H | 3.45615823  | 1.19449367  | -2.00511392 |

|   |             |             |             |
|---|-------------|-------------|-------------|
| H | 3.31915823  | 2.82149367  | -1.29011392 |
| H | 3.33515823  | 1.39849367  | -0.23311392 |
| H | 1.53215823  | 3.43449367  | -2.55211392 |
| H | 1.42915823  | 1.88749367  | -3.43211392 |
| H | -0.00084177 | 2.54249367  | -2.58311392 |
| H | 1.25415823  | 3.92749367  | 1.72888608  |
| H | -0.14484177 | 4.40649367  | 0.74388608  |
| H | -0.39384177 | 3.75649367  | 2.38388608  |
| H | 1.41915823  | -0.18250633 | -2.10311392 |
| H | -1.94284177 | 2.18849367  | 1.21688608  |
| H | 0.33015823  | 1.40949367  | 2.81888608  |
| H | -1.82884177 | -1.55350633 | -1.91011392 |
| H | -0.32884177 | -1.41050633 | -2.81811392 |
| H | 1.94115823  | -2.18850633 | -1.21811392 |
| H | 1.44515823  | -2.67550633 | 0.39788608  |
| H | -1.25584177 | -3.92750633 | -1.72811392 |
| H | 0.39215823  | -3.75850633 | -2.38211392 |
| H | 0.14215823  | -4.40650633 | -0.74211392 |
| H | -1.53084177 | -3.43350633 | 2.55288608  |
| H | 0.00315823  | -2.54550633 | 2.57688608  |
| H | -1.42084177 | -1.88650633 | 3.43188608  |
| H | -3.31984177 | -2.82150633 | 1.28988608  |
| H | -3.45484177 | -1.19650633 | 2.01088608  |
| H | -3.33784177 | -1.39350633 | 0.23888608  |
| H | 1.06115823  | 2.20249367  | -0.43611392 |
| H | -1.06184177 | -2.20150633 | 0.43388608  |

### 3a

E=-847.90760

|   |             |             |             |
|---|-------------|-------------|-------------|
| C | 0.69827500  | 1.43002600  | 0.00007400  |
| C | -0.00981300 | 0.78098500  | 1.21526200  |
| C | 0.00959800  | -0.78096800 | 1.21533200  |
| C | -0.69842900 | -1.43013300 | 0.00016100  |
| C | 0.00945700  | -0.78104100 | -1.21522400 |
| C | -0.00960900 | 0.78094300  | -1.21526500 |
| N | 2.18176800  | 1.37872700  | 0.00016200  |
| N | -2.18196400 | -1.37906400 | 0.00009300  |
| N | 1.84379100  | -2.02088800 | -0.00007700 |
| C | 2.73457300  | 2.03948200  | -1.18325600 |
| C | 2.73455200  | 2.03955700  | 1.18349400  |
| C | 3.22635800  | -2.45055100 | -0.00009500 |
| N | -1.84364900 | 2.02108100  | -0.00012000 |
| C | -3.22581500 | 2.45156600  | -0.00016700 |
| C | -2.73444200 | -2.04030400 | -1.18320200 |
| C | -2.73469800 | -2.03990600 | 1.18346700  |
| H | 0.47801500  | 1.08605800  | 2.14655600  |
| H | -0.47821900 | -1.08596200 | 2.14665800  |
| H | -0.41823600 | -2.49951200 | 0.00018100  |
| H | -0.47883400 | -1.08609500 | -2.14628100 |
| H | 0.47861100  | 1.08597800  | -2.14637700 |
| H | 2.38310500  | 3.08655400  | -1.28720700 |
| H | 3.82687300  | 2.05310400  | -1.10956200 |
| H | 2.47591200  | 1.50359700  | -2.09938700 |
| H | 3.82685200  | 2.05314600  | 1.10983400  |

|                 |             |             |             |   |             |             |             |
|-----------------|-------------|-------------|-------------|---|-------------|-------------|-------------|
| H               | 2.38311700  | 3.08665800  | 1.28739500  | C | -4.38270500 | 2.60094900  | 1.04975900  |
| H               | 2.47582600  | 1.50377900  | 2.09966800  | N | 2.61477800  | 0.24665400  | -0.40731300 |
| H               | 3.42504400  | -3.06455900 | -0.88753600 | P | 4.09096800  | -0.07640300 | -0.03391300 |
| H               | 3.94444600  | -1.60543500 | 0.00018800  | N | 4.72448300  | -1.66744200 | -0.02528400 |
| H               | 3.42497600  | -3.06508900 | 0.88700700  | N | 4.51546000  | 0.40186900  | 1.55820400  |
| H               | 0.41813900  | 2.49946900  | -0.00005500 | N | 5.08753400  | 0.69331500  | -1.17989900 |
| H               | -3.94451500 | 1.60691500  | -0.00093100 | C | 5.79480600  | 0.13202500  | 2.20624000  |
| H               | -3.42431600 | 3.06530000  | 0.88750600  | C | 3.84063400  | 1.57477300  | 2.10970900  |
| H               | -3.42400400 | 3.06659300  | -0.88703800 | C | 6.51528000  | 0.85261700  | -0.93478000 |
| H               | -3.82674400 | -2.05416500 | -1.10962100 | C | 4.53889300  | 1.68338800  | -2.10185200 |
| H               | -2.47583800 | -1.50461900 | -2.09946300 | C | 4.95444500  | -2.34807800 | -1.29945400 |
| H               | -2.38268800 | -3.08731000 | -1.28679400 | C | 4.38279400  | -2.60089700 | 1.04956300  |
| H               | -3.82699500 | -2.05368400 | 1.10976400  | H | -1.05430900 | 0.57602500  | -2.38245100 |
| H               | -2.38311100 | -3.08695200 | 1.28743100  | H | 1.05430200  | -0.57602700 | -2.38251300 |
| H               | -2.47609600 | -1.50402000 | 2.09960100  | H | 1.86235700  | -1.67687900 | -0.24674400 |
| C               | 1.45494400  | -1.37207300 | -1.25579900 | H | 1.17196700  | -0.39403900 | 1.89014500  |
| H               | 1.49936600  | -2.15468800 | -2.02712200 | H | -1.17179000 | 0.39393900  | 1.89020700  |
| H               | 2.17298500  | -0.59401900 | -1.55443500 | H | -1.06231300 | -2.01778800 | -2.11292900 |
| C               | 1.45512800  | -1.37189800 | 1.25555100  | H | -0.73901700 | -2.04285600 | 1.95048300  |
| H               | 2.17324200  | -0.59382000 | 1.55408800  | H | -1.70344600 | -3.96642500 | 0.87331200  |
| H               | 1.49965300  | -2.15443000 | 2.02699500  | H | -1.87852800 | -3.94464600 | -0.89236500 |
| C               | -1.45497100 | 1.37231000  | -1.25579100 | H | -0.34513900 | -4.48889600 | -0.15826000 |
| H               | -1.49923800 | 2.15488100  | -2.02718700 | H | -1.86225100 | 1.67687200  | -0.24661700 |
| H               | -2.17309700 | 0.59435600  | -1.55471000 | H | 0.52414800  | -2.73403500 | -1.77204100 |
| C               | -1.45523900 | 1.37206800  | 1.25536200  | H | 0.80420300  | -2.66864500 | 1.35697500  |
| H               | -2.17345700 | 0.59407800  | 1.55407600  | H | 1.06245000  | 2.01766100  | -2.11284400 |
| H               | -1.49960700 | 2.15452300  | 2.02692400  | H | -0.52400000 | 2.73399900  | -1.77206800 |
| 4               |             |             |             | H | -0.80409600 | 2.66855700  | 1.35710800  |
| E = -2178.42715 |             |             |             | H | 0.73915200  | 2.04278600  | 1.95054000  |
| C               | -1.47770400 | 0.64275000  | -0.26441100 | H | 1.87819200  | 3.94486200  | -0.89242500 |
| C               | -0.48219700 | 0.61050800  | -1.44518600 | H | 0.34481000  | 4.48884800  | -0.15809800 |
| C               | 0.48223300  | -0.61054200 | -1.44522400 | H | 1.70334500  | 3.96658400  | 0.87327800  |
| C               | 1.47777900  | -0.64277400 | -0.26450500 | H | -6.27228100 | 0.74783600  | 1.77251700  |
| C               | 0.55364100  | -0.55579600 | 0.99615100  | H | -6.48965500 | -0.98454400 | 2.12500700  |
| C               | -0.55350400 | 0.55574400  | 0.99619800  | H | -5.63019200 | 0.05916800  | 3.27678600  |
| C               | 0.21947500  | 1.99085300  | -1.40805000 | H | -3.60614200 | -1.40843600 | 3.17052400  |
| C               | -0.21938600 | -1.99092000 | -1.40807200 | H | -4.47448900 | -2.47672100 | 2.04181700  |
| C               | -0.03268600 | -1.97692800 | 1.10887000  | H | -2.91645000 | -1.75380800 | 1.55951800  |
| C               | 0.03280200  | 1.97686100  | 1.10894200  | H | -6.91121900 | 0.00283100  | -0.38288800 |
| N               | -0.73571300 | -2.38537300 | -0.09723500 | H | -7.04206200 | -0.90225300 | -1.89731900 |
| C               | -1.17927500 | -3.75674500 | -0.06778900 | H | -6.75137000 | -1.77395700 | -0.37570200 |
| N               | 0.73575400  | 2.38538900  | -0.09718100 | H | -5.03489200 | -1.58629400 | -3.07963700 |
| C               | 1.17908400  | 3.75683400  | -0.06776300 | H | -3.46918100 | -1.51059100 | -2.21547400 |
| N               | -2.61469100 | -0.24665800 | -0.40702000 | H | -4.69554300 | -2.71215100 | -1.74016500 |
| P               | -4.09089300 | 0.07637000  | -0.03371800 | H | -4.06605100 | 2.90567600  | -1.63686800 |
| N               | -4.72437000 | 1.66744500  | -0.02505800 | H | -5.22488400 | 1.62342200  | -2.06917200 |
| N               | -4.51532300 | -0.40182500 | 1.55842700  | H | -5.78038800 | 3.06401000  | -1.18442800 |
| N               | -5.08744100 | -0.69350300 | -1.17948800 | H | -5.24735500 | 3.24406600  | 1.27126900  |
| C               | -5.79494800 | -0.13221100 | 2.20611600  | H | -4.11041600 | 2.05996800  | 1.95730200  |
| C               | -3.84120400 | -1.57546800 | 2.10926300  | H | -3.54018900 | 3.25224800  | 0.77090500  |
| C               | -6.51526600 | -0.85260500 | -0.93487900 | H | 6.27244300  | -0.74770800 | 1.77233700  |
| C               | -4.53889700 | -1.68228500 | -2.10282700 | H | 6.48946700  | 0.98447000  | 2.12591700  |
| C               | -4.95440700 | 2.34802800  | -1.29922800 | H | 5.62968200  | -0.05999700 | 3.27675200  |
|                 |             |             |             | H | 3.60459000  | 1.40661600  | 3.17058400  |

|                              |             |             |             |   |             |             |             |
|------------------------------|-------------|-------------|-------------|---|-------------|-------------|-------------|
| H                            | 4.47387700  | 2.47616900  | 2.04380800  | H | 5.68843900  | -1.32866600 | 2.97406500  |
| H                            | 2.91637300  | 1.75357600  | 1.55928500  | H | 3.75552900  | 0.09433600  | 3.58452000  |
| H                            | 6.91140300  | -0.00345700 | -0.38388600 | H | 4.54128200  | 1.53962700  | 2.90386200  |
| H                            | 7.04217300  | 0.90372900  | -1.89707100 | H | 2.94250800  | 1.02737000  | 2.30720800  |
| H                            | 6.75101800  | 1.77327500  | -0.37431400 | H | 6.83627600  | 0.28150500  | -0.30608800 |
| H                            | 5.03555500  | 1.58926800  | -3.07848600 | H | 6.91783000  | 1.68447600  | -1.37903000 |
| H                            | 3.46935000  | 1.51122800  | -2.21540800 | H | 6.64548200  | 1.92532700  | 0.36110400  |
| H                            | 4.69465300  | 2.71277400  | -1.73742400 | H | 4.90381700  | 2.66805300  | -2.23953100 |
| H                            | 4.06608300  | -2.90579100 | -1.63696600 | H | 3.34147500  | 2.25217700  | -1.47913100 |
| H                            | 5.22480400  | -1.62348200 | -2.06943800 | H | 4.52064700  | 3.25437600  | -0.60074000 |
| H                            | 5.78047100  | -3.06401400 | -1.18467800 | H | 3.87227100  | -1.92335900 | -2.55186800 |
| H                            | 5.24739900  | -3.24408200 | 1.27105100  | H | 5.06200200  | -0.59772000 | -2.50829100 |
| H                            | 4.11060600  | -2.05988400 | 1.95711800  | H | 5.59968100  | -2.28214700 | -2.31041800 |
| H                            | 3.54022000  | -3.25214800 | 0.77076500  | H | 5.24563200  | -3.41038400 | -0.11139800 |
| <b>4a</b>                    |             |             |             | H | 4.17497300  | -2.61866500 | 1.06843400  |
| E= -2178.42872 (-2178.85111) |             |             |             | H | 3.50653900  | -3.23595400 | -0.45419900 |
| ZPVE= 0.82811                |             |             |             | H | -6.28246600 | 1.30760400  | 1.30139300  |
| C                            | 1.46705900  | -0.60465600 | -0.16068800 | H | -6.52055900 | -0.11120600 | 2.34976700  |
| C                            | 0.51290600  | -0.58592300 | -1.38537800 | H | -5.68828800 | 1.32864500  | 2.97412900  |
| C                            | -0.51307900 | 0.58606500  | -1.38533600 | H | -3.75521600 | -0.09444600 | 3.58446000  |
| C                            | -1.46712200 | 0.60471600  | -0.16062600 | H | -4.54125900 | -1.53965800 | 2.90397000  |
| C                            | -0.50711000 | 0.59197600  | 1.06003400  | H | -2.94250000 | -1.02762800 | 2.30705800  |
| C                            | 0.50711000  | -0.59191300 | 1.06001400  | H | -6.83611800 | -0.28178600 | -0.30518200 |
| N                            | 2.53137400  | 0.40807400  | -0.18125900 | H | -6.91790600 | -1.68403200 | -1.37905300 |
| P                            | 4.03598600  | 0.00622300  | 0.01382500  | H | -6.64526900 | -1.92604300 | 0.36088600  |
| N                            | 4.66710500  | -1.45197900 | -0.62443700 | H | -4.90433200 | -2.66793600 | -2.23959200 |
| N                            | 4.52793100  | -0.18322400 | 1.64744700  | H | -3.34154600 | -2.25155700 | -1.48034900 |
| N                            | 4.98371100  | 1.18017100  | -0.76213500 | H | -4.51965700 | -3.25426800 | -0.60115900 |
| C                            | 5.82381500  | -0.69987900 | 2.08167100  | H | -3.87235100 | 1.92305900  | -2.55198500 |
| C                            | 3.90935800  | 0.66873500  | 2.65993500  | H | -5.06244200 | 0.59774400  | -2.50818000 |
| C                            | 6.41348700  | 1.27055600  | -0.49574800 | H | -5.59962000 | 2.28232000  | -2.31024900 |
| C                            | 4.40280900  | 2.40681400  | -1.29605200 | H | -5.24604900 | 3.41008300  | -0.11082200 |
| C                            | 4.80006400  | -1.56582000 | -2.07733600 | H | -4.17448100 | 2.61861800  | 1.06835200  |
| C                            | 4.37757700  | -2.74462000 | 0.00405900  | H | -3.50706600 | 3.23630400  | -0.45455000 |
| N                            | -2.53132900 | -0.40819200 | -0.18122600 | N | -0.02650600 | -2.73083200 | -0.17278300 |
| P                            | -4.03595200 | -0.00626400 | 0.01382800  | C | -0.73760500 | -3.99106100 | -0.17121500 |
| N                            | -4.66700100 | 1.45194100  | -0.62441500 | H | -0.47827000 | -4.56544800 | -1.07012100 |
| N                            | -4.52788000 | 0.18312400  | 1.64747900  | H | -0.44255100 | -4.58292000 | 0.70549900  |
| N                            | -4.98365500 | -1.18020300 | -0.76208200 | H | -1.83961700 | -3.87685600 | -0.14586300 |
| C                            | -5.82372000 | 0.69976300  | 2.08181000  | C | -0.20086600 | -1.98528300 | 1.08269000  |
| C                            | -3.90925200 | -0.66886400 | 2.65991800  | H | 0.24818600  | -2.60993200 | 1.86929200  |
| C                            | -6.41339400 | -1.27072000 | -0.49557500 | H | -1.26546400 | -1.86274300 | 1.33019000  |
| C                            | -4.40269200 | -2.40659300 | -1.29648100 | C | -0.18740600 | -1.98119100 | -1.42875900 |
| C                            | -4.80016300 | 1.56578000  | -2.07728900 | H | -1.24590600 | -1.85412900 | -1.69996900 |
| C                            | -4.37769500 | 2.74460800  | 0.00409900  | H | 0.27692300  | -2.60035100 | -2.21088400 |
| H                            | 1.11992100  | -0.47576300 | -2.29418200 | N | 0.02634100  | 2.73095900  | -0.17278600 |
| H                            | -1.12014600 | 0.47593000  | -2.29411100 | C | 0.20088000  | 1.98534000  | 1.08264500  |
| H                            | -1.91206300 | 1.60496900  | -0.16501400 | H | -0.24805700 | 2.60999500  | 1.86930800  |
| H                            | -1.10371800 | 0.50119300  | 1.97721900  | H | 1.26550800  | 1.86279400  | 1.33001000  |
| H                            | 1.10376400  | -0.50110200 | 1.97717000  | C | 0.73758300  | 3.99111200  | -0.17124900 |
| H                            | 1.91188600  | -1.60495700 | -0.16515000 | H | 0.47823900  | 4.56555200  | -1.07011600 |
| H                            | 6.28240400  | -1.30782200 | 1.30124300  | H | 0.44265200  | 4.58297800  | 0.70550400  |
| H                            | 6.52072900  | 0.11107100  | 2.34946900  | H | 1.83958700  | 3.87678500  | -0.14597800 |
|                              |             |             |             | C | 0.18726500  | 1.98131900  | -1.42874400 |

|   |             |            |             |
|---|-------------|------------|-------------|
| H | 1.24576700  | 1.85425800 | -1.69987800 |
| H | -0.27703500 | 2.60050700 | -2.21085000 |

#### 4a.H<sup>+</sup>

E = -2178.89550 (-2179.32012)

ZPVE = 0.84361

|   |             |             |             |
|---|-------------|-------------|-------------|
| C | 1.38041500  | 0.60100200  | 0.02663000  |
| C | 0.34478400  | 0.47145000  | 1.16751300  |
| C | -0.63237800 | -0.73640600 | 1.02090800  |
| C | -1.49150300 | -0.70724700 | -0.27823400 |
| C | -0.43127600 | -0.61636800 | -1.41212500 |
| C | 0.55199700  | 0.59047700  | -1.27885300 |
| N | 2.51100400  | -0.34536400 | 0.10105600  |
| P | 4.09336200  | 0.04809300  | 0.05740400  |
| N | 4.44318400  | 1.56825100  | 0.64622300  |
| N | 4.71664500  | 0.09502800  | -1.48961900 |
| N | 4.82308500  | -1.15518800 | 0.95309400  |
| C | 5.97888500  | 0.75419900  | -1.85503200 |
| C | 4.23691800  | -0.84565400 | -2.50897900 |
| C | 6.24258500  | -1.48620300 | 0.77603500  |
| C | 4.25405100  | -1.70316100 | 2.19341000  |
| C | 4.59240800  | 1.79512300  | 2.08964600  |
| C | 4.15250000  | 2.80095900  | -0.10781900 |
| N | -2.54993000 | 0.28110100  | -0.35395400 |
| P | -4.05736400 | -0.02193500 | -0.00607900 |
| N | -4.57532100 | -0.31970200 | 1.59729300  |
| N | -4.64985300 | -1.43103800 | -0.77023800 |
| N | -4.93634200 | 1.37157400  | -0.38316800 |
| C | -5.96908300 | -2.01002100 | -0.49244300 |
| C | -4.22820400 | -1.69539100 | -2.14871500 |
| C | -6.39362200 | 1.37389300  | -0.23792200 |
| C | -4.46983500 | 2.28839700  | -1.42358800 |
| C | -4.54263200 | 0.78980900  | 2.55636700  |
| C | -4.23177400 | -1.59085800 | 2.24106000  |
| H | 0.87687900  | 0.34985500  | 2.12079100  |
| H | -1.29853400 | -0.70683100 | 1.89259200  |
| H | -1.91960200 | -1.72176700 | -0.36288400 |
| H | -0.94943600 | -0.49340800 | -2.37230600 |
| H | 1.23287800  | 0.55425400  | -2.13978500 |
| H | 1.81344600  | 1.59624300  | 0.11697300  |
| H | 6.35961500  | 1.34994600  | -1.02524700 |
| H | 6.73910700  | 0.01267200  | -2.13539200 |
| H | 5.81352600  | 1.41313500  | -2.71620500 |
| H | 4.18111400  | -0.33053100 | -3.47478500 |
| H | 4.91297200  | -1.70590100 | -2.61164600 |
| H | 3.23871200  | -1.20499800 | -2.25659200 |
| H | 6.58613300  | -1.21575300 | -0.22227800 |
| H | 6.87334000  | -0.97780600 | 1.51848800  |
| H | 6.37163600  | -2.56755000 | 0.89633700  |
| H | 4.84097100  | -1.38892100 | 3.06755600  |
| H | 3.22394300  | -1.37129600 | 2.32082400  |
| H | 4.27018800  | -2.79872300 | 2.14754100  |
| H | 3.64590200  | 2.10568900  | 2.55295400  |
| H | 4.95414600  | 0.89535800  | 2.58907700  |

|   |             |             |             |
|---|-------------|-------------|-------------|
| H | 5.33159200  | 2.58857400  | 2.24589500  |
| H | 5.00840700  | 3.48200000  | -0.02778300 |
| H | 3.98167300  | 2.57661500  | -1.16136300 |
| H | 3.26314300  | 3.30573400  | 0.28973200  |
| H | -6.29728500 | -1.76646800 | 0.51760400  |
| H | -6.72732900 | -1.64672200 | -1.20297700 |
| H | -5.91528500 | -3.10289200 | -0.58829400 |
| H | -4.14457100 | -2.77887700 | -2.30601000 |
| H | -4.95515700 | -1.30322400 | -2.87788100 |
| H | -3.26086800 | -1.23450600 | -2.34989200 |
| H | -6.70228100 | 0.72461700  | 0.58279700  |
| H | -6.72992400 | 2.39392800  | -0.01321700 |
| H | -6.90172100 | 1.04681800  | -1.15882600 |
| H | -4.79790600 | 3.30628400  | -1.17654000 |
| H | -3.38328300 | 2.26578500  | -1.47221200 |
| H | -4.87967400 | 2.02903700  | -2.41322600 |
| H | -3.54689200 | 0.90806300  | 3.01391600  |
| H | -4.81182800 | 1.72721500  | 2.06901200  |
| H | -5.26327700 | 0.58905100  | 3.35887300  |
| H | -4.99401200 | -1.83516700 | 2.99209400  |
| H | -4.19204800 | -2.40072600 | 1.51166500  |
| H | -3.25952300 | -1.53796800 | 2.75771100  |
| N | -0.12800000 | 2.65294300  | -0.00110200 |
| C | -0.85465500 | 3.91221300  | 0.00312000  |
| H | -0.64056500 | 4.45870600  | 0.92949900  |
| H | -0.52558400 | 4.53138400  | -0.83977500 |
| H | -1.94981900 | 3.78347600  | -0.07141600 |
| C | -0.20350300 | 1.96370500  | -1.30170500 |
| H | 0.27699300  | 2.63215700  | -2.02883200 |
| H | -1.23880900 | 1.80375700  | -1.62808400 |
| C | -0.41978700 | 1.83982800  | 1.19191400  |
| H | -1.49620000 | 1.66125200  | 1.31113200  |
| H | -0.08064300 | 2.43105700  | 2.05349600  |
| N | 0.83786400  | -2.42628300 | -0.16788700 |
| C | 0.24158700  | -2.00502900 | -1.45737800 |
| H | -0.51847900 | -2.73791300 | -1.78047300 |
| H | 1.04227900  | -2.03495300 | -2.20990200 |
| C | 1.24379100  | -3.83110200 | -0.20325100 |
| H | 1.77138400  | -4.09030900 | 0.72121300  |
| H | 0.38057500  | -4.51110400 | -0.30886100 |
| H | 1.91964000  | -4.00373700 | -1.04809800 |
| C | 0.03902900  | -2.12628300 | 1.04315700  |
| H | 0.71084500  | -2.22916600 | 1.90709500  |
| H | -0.75557800 | -2.88275300 | 1.16949500  |
| H | 2.18455800  | -1.33829700 | 0.01237000  |

#### 4a.2H<sup>+</sup>

E = -2179.26355 (-2179.69092)

ZPVE = 0.858002

|   |             |             |             |
|---|-------------|-------------|-------------|
| C | 1.45549100  | -0.64117300 | -0.12219700 |
| C | 0.50880200  | -0.59464200 | -1.34851200 |
| C | -0.50867200 | 0.59449100  | -1.34853400 |
| C | -1.45539900 | 0.64104600  | -0.12227600 |
| C | -0.51179100 | 0.59328500  | 1.10803000  |

|   |             |             |             |                 |             |             |             |
|---|-------------|-------------|-------------|-----------------|-------------|-------------|-------------|
| C | 0.51176400  | -0.59348700 | 1.10804100  | H               | 3.95124900  | 0.49014800  | 3.55465000  |
| C | -0.14846100 | -1.99582900 | -1.37801900 | H               | 4.74452400  | 1.81926900  | 2.67638500  |
| C | 0.14856900  | 1.99568900  | -1.37800300 | H               | 3.10374100  | 1.29579000  | 2.22159600  |
| C | 0.13971600  | 1.99743800  | 1.13784800  | H               | 6.58165400  | 1.30244400  | 0.51420800  |
| C | -0.13973300 | -1.99767400 | 1.13773100  | H               | 7.03901100  | 1.01279100  | -1.18161600 |
| N | 0.82918800  | 2.36163100  | -0.11757000 | H               | 6.43489000  | 2.60641900  | -0.67040300 |
| C | 1.23053900  | 3.77218900  | -0.11698300 | H               | 5.16736300  | 1.31519400  | -2.93085500 |
| N | -0.82915900 | -2.36176100 | -0.11768400 | H               | 3.48290400  | 1.25234700  | -2.35956800 |
| C | -1.23070300 | -3.77225100 | -0.11719200 | H               | 4.45230000  | 2.72626600  | -2.12367000 |
| N | 2.58125300  | 0.30196000  | -0.15216200 | H               | 4.20207800  | -2.28545600 | -2.44750900 |
| P | 4.17855100  | -0.05433800 | 0.04355500  | H               | 5.34672600  | -0.92589300 | -2.34038700 |
| N | 4.58764000  | -1.58083400 | -0.47134400 | H               | 5.85482800  | -2.54457500 | -1.84136500 |
| N | 4.63682200  | -0.04214100 | 1.64234400  | H               | 5.23960800  | -3.39415600 | 0.39130200  |
| N | 4.93779700  | 1.14319600  | -0.82268000 | H               | 3.96662100  | -2.56009400 | 1.30577600  |
| C | 5.87921400  | -0.66051000 | 2.14434700  | H               | 3.56575300  | -3.42272200 | -0.20092900 |
| C | 4.07879800  | 0.95259400  | 2.56980400  | H               | -6.34986200 | 1.27360600  | 1.37593600  |
| C | 6.32833000  | 1.52702300  | -0.52169900 | H               | -6.59170200 | -0.10971600 | 2.46361500  |
| C | 4.48013300  | 1.63058900  | -2.13512000 | H               | -5.64766200 | 1.29237800  | 3.00970900  |
| C | 5.01352300  | -1.84311800 | -1.85473800 | H               | -3.95075500 | -0.49061000 | 3.55440700  |
| C | 4.31978400  | -2.80399000 | 0.30278800  | H               | -4.74513900 | -1.81927000 | 2.67643600  |
| N | -2.58121600 | -0.30202800 | -0.15240600 | H               | -3.10422000 | -1.29680100 | 2.22105000  |
| P | -4.17851700 | 0.05440900  | 0.04352200  | H               | -6.58137800 | -1.30260800 | 0.51463400  |
| N | -4.58728900 | 1.58101400  | -0.47126500 | H               | -7.03926600 | -1.01334600 | -1.18113200 |
| N | -4.63672200 | 0.04202800  | 1.64230600  | H               | -6.43448500 | -2.60671400 | -0.66985600 |
| N | -4.93795100 | -1.14299400 | -0.82268200 | H               | -5.16812400 | -1.31438600 | -2.93083700 |
| C | -5.87888500 | 0.66076100  | 2.14446500  | H               | -3.48348400 | -1.25165100 | -2.36003400 |
| C | -4.07893500 | -0.95300000 | 2.56961800  | H               | -4.45277000 | -2.72566900 | -2.12430100 |
| C | -6.32826800 | -1.52725900 | -0.52131000 | H               | -4.20331400 | 2.28589600  | -2.44763100 |
| C | -4.48063400 | -1.62998700 | -2.13540600 | H               | -5.34776500 | 0.92624900  | -2.33979700 |
| C | -5.01427500 | 1.84343800  | -1.85428800 | H               | -5.85561500 | 2.54483900  | -1.84018400 |
| C | -4.31911800 | 2.80406700  | 0.30290700  | H               | -5.23898200 | 3.39404800  | 0.39226400  |
| H | 1.10463400  | -0.51238100 | -2.26638600 | H               | -3.96510200 | 2.56007000  | 1.30557500  |
| H | -1.10449900 | 0.51224400  | -2.26641100 | H               | -3.56560200 | 3.42303300  | -0.20129100 |
| H | -1.91689600 | 1.63261100  | -0.12713300 | H               | -2.25046100 | -1.28936500 | -0.13384400 |
| H | -1.10558100 | 0.51008000  | 2.02713000  | H               | 2.25038900  | 1.28930500  | -0.13364700 |
| H | 1.10549000  | -0.51035700 | 2.02718600  |                 |             |             |             |
| H | 0.89119500  | 2.06180600  | -2.18312100 |                 |             |             |             |
| H | 0.87400400  | 2.07118700  | 1.94989600  | <b>5</b>        |             |             |             |
| H | 1.83172700  | 3.98766200  | 0.77208600  | E = -1986.22965 |             |             |             |
| H | 1.83542500  | 3.98627600  | -1.00373300 | C               | 1.45835700  | 0.69788000  | 1.50662900  |
| H | 0.36181700  | 4.45201200  | -0.11956800 | C               | 0.47742400  | 0.70133700  | 2.69560800  |
| H | 1.91703400  | -1.63271800 | -0.12701400 | C               | -0.47777400 | -0.52821100 | 2.73477200  |
| H | -0.64019000 | 2.73063000  | -1.61977000 | C               | -1.46633600 | -0.59421100 | 1.55409600  |
| H | -0.65393900 | 2.72987000  | 1.37129800  | C               | -0.54789500 | -0.55035400 | 0.28768200  |
| H | -0.89100100 | -2.06193400 | -2.18322300 | C               | 0.53102000  | 0.57998200  | 0.25113700  |
| H | 0.64032400  | -2.73077000 | -1.61976200 | C               | -0.24626900 | 2.06633300  | 2.62659800  |
| H | 0.65395400  | -2.73008400 | 1.37117400  | C               | 0.24632800  | -1.89474800 | 2.74028500  |
| H | -0.87400900 | -2.07146000 | 1.94979100  | C               | 0.07804400  | -1.95692500 | 0.22826000  |
| H | -1.83554400 | -3.98621800 | -1.00400400 | C               | -0.09581300 | 1.98092400  | 0.11407200  |
| H | -0.36207800 | -4.45220400 | -0.11973400 | N               | 0.79298900  | -2.28248400 | 1.44508000  |
| H | -1.83199500 | -3.98769300 | 0.77181400  | C               | 1.40645400  | -3.58308200 | 1.44483100  |
| H | 6.35026200  | -1.27326100 | 1.37578400  | N               | -0.80202900 | 2.37793300  | 1.31484200  |
| H | 6.59187100  | 0.11013300  | 2.46345700  | C               | -1.41519400 | 3.67672200  | 1.24289800  |
| H | 5.64826400  | -1.29220400 | 3.00961200  | N               | 2.57338400  | -0.21562500 | 1.69432400  |
|   |             |             |             | C               | 3.65491800  | -0.07341800 | 0.97715400  |

|   |             |             |             |                              |             |             |             |
|---|-------------|-------------|-------------|------------------------------|-------------|-------------|-------------|
| C | 4.76534500  | -0.96811600 | 1.26267000  | H                            | 9.97982100  | -1.16034300 | -2.51727800 |
| C | 3.90160400  | 0.89994000  | -0.07808900 | H                            | 7.50289100  | -3.09419800 | -1.56790500 |
| C | 5.95900400  | -0.91765000 | 0.60835400  | H                            | 7.77454700  | -2.36307400 | -3.16454000 |
| C | 5.08632600  | 0.96518900  | -0.76195200 | H                            | 6.31699100  | -1.94148200 | -2.22165700 |
| C | 6.19625500  | 0.05466800  | -0.46589500 | H                            | 8.50031200  | 0.67914100  | -3.44460900 |
| C | 7.40992300  | 0.10540900  | -1.16222700 | H                            | 8.41908900  | 2.43928200  | -3.23211500 |
| N | 8.08325500  | -1.04568600 | -1.54983600 | H                            | 9.82153900  | 1.54439800  | -2.61385000 |
| N | 8.01406300  | 1.30963200  | -1.50605200 | H                            | 7.65604900  | 3.32470900  | -0.92435000 |
| C | 9.53484800  | -1.15799100 | -1.51056300 | H                            | 7.63928500  | 2.12130300  | 0.38535600  |
| C | 7.38077400  | -2.17175600 | -2.15430900 | H                            | 9.18648100  | 2.62691100  | -0.34995000 |
| C | 8.73149600  | 1.49693500  | -2.75967600 | H                            | -4.64307100 | 1.77905200  | 2.00191700  |
| C | 8.12639300  | 2.40454700  | -0.54825400 | H                            | -3.08861200 | -1.56872000 | -0.28267000 |
| N | -2.58028000 | 0.32900200  | 1.69160700  | H                            | -9.95312500 | 0.24313300  | -0.96752700 |
| C | -3.65890200 | 0.14230600  | 0.98056200  | H                            | -9.83521700 | 2.00295100  | -1.15175100 |
| C | -4.77482200 | 1.04696000  | 1.20813000  | H                            | -9.97682900 | 0.97773900  | -2.59424200 |
| C | -3.89456800 | -0.89104500 | -0.01833300 | H                            | -7.52000200 | 2.98387800  | -1.75216100 |
| C | -5.96490500 | 0.95213200  | 0.55194100  | H                            | -7.77617900 | 2.15642200  | -3.30366600 |
| C | -5.07659800 | -1.00464300 | -0.70029000 | H                            | -6.32086600 | 1.80430600  | -2.32932900 |
| C | -6.19287200 | -0.08524000 | -0.46194600 | H                            | -8.48150400 | -0.90708300 | -3.40451700 |
| C | -7.40389100 | -0.18565100 | -1.15717500 | H                            | -8.38972600 | -2.64981400 | -3.08261600 |
| N | -8.08374500 | 0.93546700  | -1.61440700 | H                            | -9.80052100 | -1.72787300 | -2.52629500 |
| N | -7.99908400 | -1.41249700 | -1.42860200 | H                            | -7.62811400 | -3.38478400 | -0.72190900 |
| C | -9.53624600 | 1.03874100  | -1.58740900 | H                            | -7.62777600 | -2.10274100 | 0.51116100  |
| C | -7.38689100 | 2.02911200  | -2.28164800 | H                            | -9.16702200 | -2.66546600 | -0.19888000 |
| C | -8.71020000 | -1.68208400 | -2.67077800 | H                            | -6.05940600 | -2.30006700 | -1.96661700 |
| C | -8.10767900 | -2.44709500 | -0.40555500 | H                            | -4.42083600 | -2.60406000 | -1.77580200 |
| N | -5.14994100 | -1.90025100 | -1.78328900 | H                            | -7.68504900 | 2.05196000  | 0.26624400  |
| N | -7.06404800 | 1.72420300  | 0.99401400  | H                            | -6.78233900 | 2.48725400  | 1.60013200  |
| N | 7.05262000  | -1.66456300 | 1.10384700  | H                            | 7.67845800  | -2.03659200 | 0.40208800  |
| N | 5.16881000  | 1.79454300  | -1.89590100 | H                            | 6.76450300  | -2.38885900 | 1.75291800  |
| H | 1.06084400  | 0.69445100  | 3.62610500  | H                            | 6.08168500  | 2.17631400  | -2.09953500 |
| H | -1.05507900 | -0.46725200 | 3.66711100  | H                            | 4.44520200  | 2.50315600  | -1.93175100 |
| H | -1.88925100 | -1.61506100 | 1.57240400  |                              |             |             |             |
| H | -1.16089700 | -0.42533400 | -0.61449300 |                              |             |             |             |
| H | 1.13703700  | 0.40207400  | -0.64676700 | <b>5a</b>                    |             |             |             |
| H | 1.08336900  | -1.88326800 | 3.45140400  | E= -1986.23265 (-1986.71340) |             |             |             |
| H | 0.79190600  | -2.02821500 | -0.60720300 | ZPVE= 0.89728                |             |             |             |
| H | 1.96411100  | -3.73647600 | 0.51208200  | C                            | 1.44494300  | 0.62857600  | 1.38032500  |
| H | 2.11574800  | -3.66139700 | 2.27846900  | C                            | 0.49928700  | 0.59848200  | 2.60366200  |
| H | 0.67318200  | -4.41614400 | 1.54344800  | C                            | -0.49955000 | -0.59797400 | 2.60355200  |
| H | 1.88143600  | 1.71789200  | 1.46238900  | C                            | -1.44486900 | -0.62809300 | 1.37999100  |
| H | -0.48420700 | -2.65096600 | 3.10520900  | C                            | -0.48993200 | -0.60500400 | 0.15274800  |
| H | -0.73661600 | -2.68720500 | 0.00691700  | C                            | 0.49031500  | 0.60535400  | 0.15283000  |
| H | -1.07811200 | 2.09711400  | 3.34314700  | N                            | 2.45961200  | -0.41223600 | 1.41594400  |
| H | 0.48718900  | 2.84195100  | 2.94158000  | C                            | 3.59760600  | -0.21597600 | 0.80278000  |
| H | 0.71700900  | 2.69682300  | -0.15548600 | C                            | 4.61456100  | -1.24755000 | 0.92513100  |
| H | -0.81584800 | 2.00321700  | -0.71877100 | C                            | 3.97278000  | 0.93168600  | -0.00953500 |
| H | -2.11822000 | 3.80405000  | 2.07582300  | C                            | 5.84974900  | -1.15607900 | 0.35531000  |
| H | -0.68108400 | 4.51366900  | 1.28718400  | C                            | 5.19357800  | 1.03456800  | -0.62068400 |
| H | -1.97968900 | 3.77556700  | 0.30690700  | C                            | 6.22132600  | 0.00143600  | -0.46671800 |
| H | 4.62675600  | -1.65088500 | 2.09819300  | C                            | 7.48176200  | 0.11152000  | -1.06677500 |
| H | 3.10176400  | 1.56665100  | -0.38446400 | N                            | 8.11320600  | -0.97420100 | -1.65742000 |
| H | 9.95566300  | -0.33020800 | -0.93718700 | N                            | 8.17616900  | 1.31370100  | -1.10362500 |
| H | 9.82442900  | -2.09688800 | -1.01716400 | C                            | 9.55004000  | -1.19404100 | -1.56383400 |
|   |             |             |             | C                            | 7.39036700  | -1.89616100 | -2.52653000 |



|   |              |             |             |   |             |             |             |
|---|--------------|-------------|-------------|---|-------------|-------------|-------------|
| C | 8.98601700   | 1.71970700  | -2.24443500 | H | -6.33786000 | -2.39370600 | -1.66871900 |
| C | 8.25362200   | 2.18624400  | 0.06340300  | H | -4.72359700 | -2.81375300 | -1.49210000 |
| N | -2.45945400  | 0.41284000  | 1.41521300  | H | -7.49708900 | 2.34514400  | -0.00571700 |
| C | -3.59742200  | 0.21646800  | 0.80204100  | H | -6.47410700 | 2.89763400  | 1.19217200  |
| C | -4.61434000  | 1.24813000  | 0.92402400  | H | 7.49741300  | -2.34462600 | -0.00437900 |
| C | -3.97261800  | -0.93140400 | -0.01000700 | H | 6.47441900  | -2.89699300 | 1.19359400  |
| C | -5.84957900  | 1.15647900  | 0.35432800  | H | 6.33788100  | 2.39367600  | -1.66871000 |
| C | -5.19344500  | -1.03443700 | -0.62104500 | H | 4.72356300  | 2.81362900  | -1.49215000 |
| C | -6.22124900  | -0.00135400 | -0.46719000 | N | -0.12333900 | 2.72327600  | 1.38468200  |
| C | -7.48191100  | -0.11193600 | -1.06667800 | C | -0.21640400 | 1.98120600  | 2.65627700  |
| N | -8.11378300  | 0.97336900  | -1.65761600 | H | -1.26104300 | 1.84989100  | 2.97218500  |
| N | -8.17602800  | -1.31431000 | -1.10264700 | H | 0.28156700  | 2.61566900  | 3.40560300  |
| C | -9.55055700  | 1.19326500  | -1.56321700 | C | -0.24879500 | 1.97722200  | 0.12337400  |
| C | -7.39145100  | 1.89496700  | -2.52753000 | H | 0.20628300  | 2.61650100  | -0.64984300 |
| C | -8.98635800  | -1.72107700 | -2.24284900 | H | -1.30136900 | 1.82884500  | -0.16401700 |
| C | -8.25263800  | -2.18636000 | 0.06480600  | C | -0.92773200 | 3.92507800  | 1.39319300  |
| N | -5.39148900  | -2.05542300 | -1.56821100 | H | -0.68302700 | 4.52985000  | 2.27659400  |
| N | -6.85193600  | 2.07996500  | 0.72603600  | H | -0.70993300 | 4.52681000  | 0.50026400  |
| N | 6.85215200   | -2.07939800 | 0.72725800  | H | -2.01763000 | 3.72034300  | 1.41004900  |
| N | 5.39155000   | 2.05536700  | -1.56802700 | N | 0.12320300  | -2.72295400 | 1.38483800  |
| H | 1.11230700   | 0.49470500  | 3.50884800  | C | 0.21619500  | -1.98069000 | 2.65639100  |
| H | -1.11279800  | -0.49418300 | 3.50858300  | H | 1.26082600  | -1.84930200 | 2.97225300  |
| H | -1.92659000  | -1.61499600 | 1.38985700  | H | -0.28177000 | -2.61508500 | 3.40575600  |
| H | -1.09111800  | -0.51756700 | -0.76250800 | C | 0.92771900  | -3.92471200 | 1.39363800  |
| H | 1.09171900   | 0.51784700  | -0.76227600 | H | 2.01758100  | -3.71985900 | 1.41077400  |
| H | 1.92655100   | 1.61554600  | 1.39022400  | H | 0.68280700  | -4.52943500 | 2.27700800  |
| H | 4.37623000   | -2.08154200 | 1.58145500  | H | 0.71019100  | -4.52649900 | 0.50068500  |
| H | 3.23239100   | 1.69692300  | -0.22077700 | C | 0.24925500  | -1.97684300 | 0.12359200  |
| H | 9.97767500   | -0.53423700 | -0.80706700 | H | -0.20538500 | -2.61612700 | -0.64986400 |
| H | 9.75001700   | -2.23270200 | -1.26400300 | H | 1.30197000  | -1.82841400 | -0.16322400 |
| H | 10.06130600  | -1.02018200 | -2.52273100 |   |             |             |             |
| H | 7.43939800   | -2.93035300 | -2.15595100 |   |             |             |             |
| H | 7.82657300   | -1.88225200 | -3.53727300 |   |             |             |             |
| H | 6.34337300   | -1.59678500 | -2.58334600 |   |             |             |             |
| H | 8.77042400   | 1.07756100  | -3.10012900 |   |             |             |             |
| H | 8.74547000   | 2.75570400  | -2.52322300 |   |             |             |             |
| H | 10.06379500  | 1.67655200  | -2.02638000 |   |             |             |             |
| H | 7.82950000   | 3.17996000  | -0.14049200 |   |             |             |             |
| H | 7.70332300   | 1.73689500  | 0.89058700  |   |             |             |             |
| H | 9.30460500   | 2.32391700  | 0.35987100  |   |             |             |             |
| H | -4.37594000  | 2.08237100  | 1.58000700  |   |             |             |             |
| H | -3.23221000  | -1.69663900 | -0.22117700 |   |             |             |             |
| H | -9.97768300  | 0.53395000  | -0.80573600 |   |             |             |             |
| H | -9.75032500  | 2.23211200  | -1.26390200 |   |             |             |             |
| H | -10.06246500 | 1.01880300  | -2.52166000 |   |             |             |             |
| H | -7.43999000  | 2.92929200  | -2.15724200 |   |             |             |             |
| H | -7.82845200  | 1.88083900  | -3.53792300 |   |             |             |             |
| H | -6.34455800  | 1.59537100  | -2.58506700 |   |             |             |             |
| H | -8.77108200  | -1.07955100 | -3.09908900 |   |             |             |             |
| H | -8.74594500  | -2.75728000 | -2.52097000 |   |             |             |             |
| H | -10.06405200 | -1.67774200 | -2.02441300 |   |             |             |             |
| H | -7.82812200  | -3.17996100 | -0.13880500 |   |             |             |             |
| H | -7.70223600  | -1.73638300 | 0.89158100  |   |             |             |             |
| H | -9.30344500  | -2.32437000 | 0.36172800  |   |             |             |             |

**5a.H<sup>+</sup>**  
E = -1986.72845 (-1987.21208)  
ZPVE = 0.91345

|   |             |             |             |
|---|-------------|-------------|-------------|
| C | -1.55438200 | 0.61845300  | -0.90229100 |
| C | -0.45384200 | 0.53547700  | -1.98870700 |
| C | 0.59456900  | -0.59524400 | -1.74650700 |
| C | 1.36497100  | -0.48604700 | -0.40608300 |
| C | 0.27350800  | -0.34544800 | 0.68429200  |
| C | -0.76262700 | 0.79277000  | 0.42611400  |
| N | -2.49579300 | -0.47600300 | -0.96156600 |
| C | -3.73180500 | -0.28326600 | -0.55472600 |
| C | -4.66291000 | -1.38193600 | -0.71153000 |
| C | -4.28034700 | 0.91827200  | 0.04478100  |
| C | -5.98608100 | -1.29835400 | -0.37814600 |
| C | -5.60092000 | 1.02124200  | 0.41215500  |
| C | -6.53951100 | -0.07503500 | 0.20319800  |
| C | -7.90754600 | 0.04490200  | 0.52153700  |
| N | -8.59956500 | -0.96351900 | 1.15950100  |
| N | -8.62842000 | 1.17748900  | 0.20084300  |
| C | -9.98934300 | -1.28945300 | 0.85036800  |
| C | -8.00489400 | -1.72692700 | 2.25478800  |
| C | -9.69833400 | 1.70597200  | 1.04318400  |
| C | -8.41760300 | 1.88905300  | -1.05862000 |



|   |              |             |             |   |             |             |             |
|---|--------------|-------------|-------------|---|-------------|-------------|-------------|
| C | 3.86088500   | -0.28262300 | 0.11908200  | H | 6.36965300  | -3.35262400 | 0.30555100  |
| C | 4.69776500   | -1.42485300 | 0.18137900  | H | -7.81771500 | 2.45085800  | -0.20537700 |
| C | 4.47010700   | 0.98901400  | -0.01601100 | H | -6.38107200 | 3.34183900  | -0.27015600 |
| C | 6.08179600   | -1.32218900 | 0.14923900  | H | -7.32812400 | -2.55867200 | 0.33007700  |
| C | 5.85456000   | 1.11865200  | -0.04971700 | H | -5.75986200 | -3.18457100 | 0.14204300  |
| C | 6.71131000   | -0.02970000 | 0.03848500  | N | 0.64453700  | -2.42228900 | -0.19181100 |
| C | 8.15289200   | 0.10953800  | 0.08257200  | C | 0.18418800  | -1.90905800 | -1.49836200 |
| N | 8.94385700   | -0.61500300 | -0.75774400 | H | -0.60577800 | -2.56081900 | -1.91521000 |
| N | 8.73831700   | 0.94087800  | 0.97364400  | H | 1.03595500  | -1.96730000 | -2.18887300 |
| C | 10.29697600  | -1.06915500 | -0.40881500 | C | 0.95037500  | -3.84980200 | -0.25323800 |
| C | 8.49731100   | -1.01116600 | -2.09991500 | H | 1.41083700  | -4.17254200 | 0.68690200  |
| C | 9.99036500   | 1.66358200  | 0.71064400  | H | 0.04921600  | -4.46599900 | -0.42348500 |
| C | 8.08291900   | 1.31727700  | 2.23379000  | H | 1.65457600  | -4.04476500 | -1.06924200 |
| N | 6.40320700   | 2.39394100  | -0.16999800 | N | -0.65627700 | 2.41507300  | -0.05774100 |
| N | 6.83832500   | -2.45901600 | 0.36288300  | C | -0.19575500 | 1.90358500  | 1.24928200  |
| N | -6.82878900  | 2.47348100  | -0.00884900 | H | -1.04741100 | 1.96228500  | 1.93986600  |
| N | -6.38756800  | -2.40514900 | 0.00221800  | H | 0.59408000  | 2.55613600  | 1.66523000  |
| H | -1.41935200  | -0.57133100 | 1.82122800  | C | -0.96425700 | 3.84222900  | 0.00246400  |
| H | 0.84023400   | 0.27960200  | 2.17476400  | H | -1.42483600 | 4.16335500  | -0.93814600 |
| H | 1.98383100   | 1.48563600  | 0.25987000  | H | -1.66903000 | 4.03686800  | 0.81803800  |
| H | 1.40931100   | 0.56376600  | -2.06855900 | H | -0.06407800 | 4.45988900  | 0.17261100  |
| H | -0.85167200  | -0.28345000 | -2.42164800 | C | 0.15360200  | 2.08281800  | -1.24452600 |
| H | -1.99102600  | -1.49400400 | -0.50677000 | H | 1.01926500  | 2.76654500  | -1.33174100 |
| H | -4.25078300  | 2.40231300  | -0.35174900 | H | -0.47333800 | 2.25796600  | -2.12896600 |
| H | -3.87141200  | -1.90479200 | -0.15821300 | C | -0.16308200 | -2.08930600 | 0.99669900  |
| H | -10.43358600 | 1.06180100  | 0.60834800  | H | 0.46568000  | -2.26458300 | 1.87986100  |
| H | -10.42077000 | 1.96068800  | -0.92160300 | H | -1.02868900 | -2.77266500 | 1.08562200  |
| H | -11.09877800 | 0.32475800  | -0.87683000 | H | 2.15038400  | -1.43757200 | 0.12145900  |
| H | -8.41107900  | 1.71302300  | -2.41837500 | H | -2.16347900 | 1.42772300  | -0.37192000 |
| H | -9.35816400  | 0.26808600  | -2.83821500 |   |             |             |             |
| H | -7.64094100  | 0.10653500  | -2.38830200 |   |             |             |             |
| H | -10.24380100 | -1.66428500 | 0.03613500  |   |             |             |             |
| H | -9.80535900  | -2.52109600 | 1.52728000  |   |             |             |             |
| H | -10.75532400 | -1.02911300 | 1.62528100  |   |             |             |             |
| H | -7.63213500  | -1.89982000 | 2.64685800  |   |             |             |             |
| H | -7.18214100  | -0.18079600 | 2.50858100  |   |             |             |             |
| H | -8.73580000  | -0.64246300 | 3.24999000  |   |             |             |             |
| H | 4.24377900   | -2.40270600 | 0.32064200  |   |             |             |             |
| H | 3.87030500   | 1.88414700  | -0.13462200 |   |             |             |             |
| H | 10.45404300  | -0.99340100 | 0.66743300  |   |             |             |             |
| H | 10.39385400  | -2.12038700 | -0.70282000 |   |             |             |             |
| H | 11.07297000  | -0.50104500 | -0.93398500 |   |             |             |             |
| H | 8.40256200   | -2.10075800 | -2.17704300 |   |             |             |             |
| H | 9.23889500   | -0.67798700 | -2.83498500 |   |             |             |             |
| H | 7.53458300   | -0.55335500 | -2.32350400 |   |             |             |             |
| H | 10.26265400  | 1.58865000  | -0.34231000 |   |             |             |             |
| H | 9.83067400   | 2.71942700  | 0.95586200  |   |             |             |             |
| H | 10.81440500  | 1.29071900  | 1.32853600  |   |             |             |             |
| H | 7.63896500   | 2.31494100  | 2.15228200  |   |             |             |             |
| H | 7.30476300   | 0.59518300  | 2.47844800  |   |             |             |             |
| H | 8.83814500   | 1.31678500  | 3.02610100  |   |             |             |             |
| H | 7.28546600   | 2.47511600  | -0.65903400 |   |             |             |             |
| H | 5.75291900   | 3.11656200  | -0.45496000 |   |             |             |             |
| H | 7.80906400   | -2.47752000 | 0.09337700  |   |             |             |             |

**B3LYP/6-31+G\* SCF energies in gas phase (E), and Cartesian coordinates for 1b-1e (All energies are given in Hartree).**

**1b**

E= -541.90997

|   |             |             |             |
|---|-------------|-------------|-------------|
| C | -0.20906500 | 0.20578300  | 1.52308600  |
| C | -0.51512000 | -1.14205300 | 0.84960500  |
| C | 0.38880700  | -1.36829500 | -0.40419200 |
| C | 1.27175900  | -0.15412300 | -0.78550800 |
| C | 0.37842400  | 1.10637000  | -0.79340700 |
| C | -0.49345800 | 1.30386400  | 0.48515400  |
| C | -2.01210600 | -1.16030600 | 0.48589400  |
| N | 2.47362200  | -0.06575200 | 0.08594900  |
| C | -1.99434900 | 1.25006000  | 0.13967000  |
| N | -2.36381900 | -0.05595500 | -0.40789900 |
| C | -3.75690600 | -0.10551800 | -0.81980800 |
| C | 3.45518600  | -1.09071700 | -0.25819700 |
| C | 3.12505200  | 1.23999900  | 0.10283800  |
| H | -0.34763800 | -1.95490200 | 1.56768000  |
| H | 1.61905900  | -0.29802700 | -1.82947000 |
| H | -0.29153300 | 2.29015600  | 0.92377100  |
| H | -0.85948300 | 0.34213400  | 2.39913400  |

|   |             |             |             |
|---|-------------|-------------|-------------|
| H | -2.27013700 | -2.09965200 | -0.02129800 |
| H | -2.61009200 | -1.12161500 | 1.42262500  |
| H | -2.58590900 | 1.48633500  | 1.05071300  |
| H | -2.24132400 | 2.01265200  | -0.61121500 |
| H | -3.95761100 | 0.68841800  | -1.54841800 |
| H | -3.96881600 | -1.06887600 | -1.29780600 |
| H | 4.28603900  | -1.05796800 | 0.45486400  |
| H | 3.01516600  | -2.08947800 | -0.20712200 |
| H | 4.02311000  | 1.17629100  | 0.72670600  |
| H | 2.47401000  | 1.99947600  | 0.54444300  |
| H | 0.82847800  | 0.24068700  | 1.86392200  |
| H | -4.46191000 | 0.01969100  | 0.02781400  |
| H | 3.87043500  | -0.95453200 | -1.27870000 |
| H | 3.43840100  | 1.58936300  | -0.90257600 |
| H | -0.24952000 | -1.58247100 | -1.27035500 |
| H | 1.01154800  | -2.25565800 | -0.25536600 |
| H | -0.29095300 | 0.97783600  | -1.65171500 |
| H | 0.97071700  | 2.00170600  | -1.00479200 |

**1c**

E= -541.90247

|   |             |             |             |
|---|-------------|-------------|-------------|
| C | 1.41261500  | -1.79106900 | 0.00011700  |
| C | 0.83734200  | -1.08055500 | 1.23435400  |
| C | -0.69651500 | -1.27431900 | 1.25806500  |
| C | -1.46194800 | -0.78508300 | 0.00003000  |
| C | -0.69639500 | -1.27440200 | -1.25791500 |
| N | -1.74222000 | 0.67450400  | -0.00009300 |
| C | -2.48230400 | 1.09835700  | -1.18831600 |
| C | -2.48214200 | 1.09865400  | 1.18813600  |
| H | 1.22858000  | -1.55760600 | 2.14268000  |
| H | -1.11944700 | -0.84314800 | 2.17059100  |
| H | -2.44445100 | -1.30659700 | -0.00000500 |
| H | -1.11935800 | -0.84328200 | -2.17045300 |
| H | 2.50634700  | -1.75013900 | 0.00023200  |
| H | -2.74674000 | 2.15548100  | -1.08712200 |
| H | -1.87765900 | 1.00291300  | -2.09282000 |
| H | -2.74672800 | 2.15571100  | 1.08663600  |
| H | -1.87731000 | 1.00359200  | 2.09255700  |
| H | 1.11720600  | -2.84972700 | 0.00018000  |
| H | -0.88682800 | -2.35476200 | 1.33293200  |
| H | -0.88670300 | -2.35485000 | -1.33276100 |
| H | -3.42002600 | 0.52347600  | -1.33629500 |
| H | -3.41977300 | 0.52372400  | 1.33649200  |
| N | 2.01937800  | 0.75302300  | 0.00006800  |
| C | 2.46036500  | 2.13581800  | -0.00007600 |
| H | 3.07431400  | 2.32974000  | -0.88789400 |
| H | 1.61936500  | 2.85970000  | -0.00025700 |
| C | 3.07418800  | 2.33000200  | 0.88776200  |
| C | 1.29568800  | 0.41040700  | -1.22927000 |
| H | 1.98922900  | 0.58728400  | -2.06158300 |
| H | 0.43102000  | 1.07947100  | -1.38203200 |
| C | 0.83746900  | -1.08067900 | -1.23422500 |
| H | 1.22861200  | -1.55791000 | -2.14251100 |
| C | 1.29533200  | 0.41067200  | 1.22919900  |

|   |            |            |            |
|---|------------|------------|------------|
| H | 0.43048600 | 1.07959700 | 1.38151900 |
| H | 1.98853500 | 0.58783500 | 2.06173100 |

**1d**

E= -541.91048 Ha

|   |             |             |             |
|---|-------------|-------------|-------------|
| C | 1.16879200  | 0.00162400  | 1.81635400  |
| C | 0.84252900  | 1.23511900  | 0.96354900  |
| C | -0.67071400 | 1.27062300  | 0.65969900  |
| C | -0.67052600 | -1.26959700 | 0.66195500  |
| H | 1.07862900  | 2.14499400  | 1.52989800  |
| H | -0.87969700 | 2.15468300  | 0.04566700  |
| H | -0.87938900 | -2.15478800 | 0.04951800  |
| H | 2.22171500  | 0.00198400  | 2.11631800  |
| H | 0.55927200  | 0.00238600  | 2.73030300  |
| H | -1.22082600 | 1.39922900  | 1.60294800  |
| H | -1.22069700 | -1.39653700 | 1.60539000  |
| N | 2.51758300  | -0.00026800 | -0.43624900 |
| C | 3.35333400  | -0.00125600 | -1.62323300 |
| H | 3.99639300  | -0.88909900 | -1.62434300 |
| H | 2.76651700  | -0.00210000 | -2.56555300 |
| H | 3.99632000  | 0.88663200  | -1.62587200 |
| C | 1.71916900  | -1.22208200 | -0.32565700 |
| H | 2.42190800  | -2.06423500 | -0.31108900 |
| H | 1.08134900  | -1.36536800 | -1.22348800 |
| C | 0.84270600  | -1.23342600 | 0.96577200  |
| H | 1.07888500  | -2.14228400 | 1.53372200  |
| C | 1.71893400  | 1.22158200  | -0.32786700 |
| H | 1.08106300  | 1.36306600  | -1.22596700 |
| H | 2.42149600  | 2.06391600  | -0.31490900 |
| C | -1.20268300 | -0.00012700 | -0.03914600 |
| H | -0.82154100 | -0.00099200 | -1.08145200 |
| N | -2.68459200 | -0.00037700 | -0.08188600 |
| C | -3.23115500 | 1.19167900  | -0.72847400 |
| H | -4.32222200 | 1.10878100  | -0.76460300 |
| H | -2.99035900 | 2.09279400  | -0.16046900 |
| H | -2.86422200 | 1.32523500  | -1.76747400 |
| C | -3.23056300 | -1.19293300 | -0.72805300 |
| H | -2.98930200 | -2.09373700 | -0.15975300 |
| H | -4.32167400 | -1.11063600 | -0.76424400 |
| H | -2.86350400 | -1.32663600 | -1.76699200 |

**1e**

E= -541.90200

|   |            |             |             |
|---|------------|-------------|-------------|
| C | 0.91704700 | -0.37057600 | 1.67247000  |
| C | 0.82545800 | 1.01761200  | 1.01768100  |
| H | 0.78739300 | 1.79387100  | 1.79105100  |
| H | 1.89144800 | -0.49545200 | 2.15557200  |
| H | 0.14850700 | -0.50796200 | 2.44314400  |
| N | 2.69481100 | -0.05402600 | -0.23548900 |
| C | 3.75308700 | 0.12227600  | -1.21201000 |
| H | 4.22716400 | -0.84220900 | -1.42771300 |
| H | 3.39302600 | 0.55272400  | -2.16974300 |
| H | 4.51858300 | 0.79575800  | -0.80815900 |
| C | 1.67769300 | -1.01750800 | -0.64983500 |

|   |             |             |             |
|---|-------------|-------------|-------------|
| H | 2.19719100  | -1.91688700 | -1.00138400 |
| H | 1.09287400  | -0.64414900 | -1.51507300 |
| C | 0.72478500  | -1.38550100 | 0.53440600  |
| H | 0.98949500  | -2.38980400 | 0.88636200  |
| C | 2.12490000  | 1.22682300  | 0.19726100  |
| H | 1.91772900  | 1.88960900  | -0.66784400 |
| H | 2.88437300  | 1.73293200  | 0.80937700  |
| C | -0.45849300 | 1.14112900  | 0.12868200  |
| H | -0.94063300 | 2.09619700  | 0.35662600  |
| H | -0.18633100 | 1.18458300  | -0.93350100 |
| C | -1.46448400 | -0.01384700 | 0.31298300  |
| H | -1.83777200 | 0.03363400  | 1.35852900  |
| C | -0.76570900 | -1.38831000 | 0.11370700  |
| H | -0.85675500 | -1.67579300 | -0.94216600 |
| H | -1.29614900 | -2.14996300 | 0.69753500  |
| N | -2.62270500 | 0.11233400  | -0.59958900 |
| C | -3.30226900 | 1.40272500  | -0.49892500 |
| H | -2.65686200 | 2.21563100  | -0.83891300 |
| H | -4.18380200 | 1.39108200  | -1.14813200 |
| H | -3.64218400 | 1.63240200  | 0.53240400  |
| C | -3.59394100 | -0.96176000 | -0.39599000 |
| H | -4.42912900 | -0.82888600 | -1.09140300 |
| H | -3.14657200 | -1.93729200 | -0.59871900 |
| H | -4.00478600 | -0.97656200 | 0.63511300  |

**B3LYP/6-31+G\* SCF energies in gas phase (E), and Cartesian coordinates for 2-CHMe<sub>2</sub>-ax, 2-CHMe<sub>2</sub>-eq, 3-CHMe<sub>2</sub>-ax and 3-CHMe<sub>2</sub>-eq (All energies are given in Hartree).**

**2-CHMe<sub>2</sub>-ax**

E= -831.87414

|   |             |             |             |
|---|-------------|-------------|-------------|
| C | -0.58124300 | -2.32214200 | 0.00002300  |
| C | -0.70347800 | -1.39353800 | -1.21451500 |
| C | 0.43934900  | -0.31331600 | -1.21538500 |
| C | 0.44966100  | 0.68900600  | -0.00004100 |
| C | 0.43941400  | -0.31324800 | 1.21532300  |
| C | -0.70338500 | -1.39349600 | 1.21453700  |
| C | -2.17765400 | -0.93689100 | -1.25422200 |
| C | 1.81369700  | -1.02707500 | -1.26702200 |
| N | -0.71288400 | 1.58586400  | -0.00002600 |
| C | 1.81381600  | -1.02695000 | 1.26688000  |
| C | -2.17755500 | -0.93680300 | 1.25435500  |
| N | 2.21969500  | -1.64533100 | -0.00005500 |
| C | 3.59964600  | -2.08054000 | -0.00010000 |
| N | -2.69460600 | -0.38718600 | 0.00007500  |
| C | -4.14110600 | -0.30894500 | 0.00011500  |
| C | -1.26370900 | 2.19390800  | 1.18646300  |
| C | -1.26365700 | 2.19379800  | -1.18658800 |
| H | -0.55388400 | -1.96642100 | -2.14098200 |
| H | 0.36312600  | 0.23486900  | -2.16021100 |
| H | 0.36322200  | 0.23498100  | 2.16013000  |
| H | -0.55372600 | -1.96635700 | 2.14100500  |
| H | 1.76744000  | -1.82774700 | -2.02140500 |

|   |             |             |             |
|---|-------------|-------------|-------------|
| H | 1.76768900  | -1.82752400 | 2.02137500  |
| H | 3.79920400  | -2.69432500 | 0.88680900  |
| H | 3.79914600  | -2.69437400 | -0.88699000 |
| H | 4.32312700  | -1.23756800 | -0.00014600 |
| H | -1.40681700 | -3.04839000 | 0.00007400  |
| H | 2.57594900  | -0.31723600 | -1.63415300 |
| H | 2.57607400  | -0.31702300 | 1.63383100  |
| H | -2.34709700 | -0.19340400 | -2.04520800 |
| H | -2.75760900 | -1.83765700 | -1.55005200 |
| H | -2.75752000 | -1.83750900 | 1.55034100  |
| H | -2.34684100 | -0.19323300 | 2.04529700  |
| H | -4.48861200 | 0.23433400  | -0.88703600 |
| H | -4.63062200 | -1.30792500 | 0.00021600  |
| H | -4.48856400 | 0.23448300  | 0.88719700  |
| H | -2.35326300 | 2.02266400  | 1.22756200  |
| H | -0.82699800 | 1.79574700  | 2.10184000  |
| H | -1.10895500 | 3.28966300  | 1.20146400  |
| H | -2.35322900 | 2.02263000  | -1.22766400 |
| H | -1.10883100 | 3.28954500  | -1.20181700 |
| H | -0.82704200 | 1.79546300  | -2.10193700 |
| H | 0.35475200  | -2.87879600 | 0.00000400  |
| C | 1.78089400  | 1.56688200  | -0.00009800 |
| H | 2.65212700  | 0.90731500  | -0.00042000 |
| C | 1.92392200  | 2.45717200  | 1.24939900  |
| H | 2.90465500  | 2.94972300  | 1.23826000  |
| H | 1.16411700  | 3.24395400  | 1.27481800  |
| H | 1.85757000  | 1.89333100  | 2.18665100  |
| C | 1.92335500  | 2.45782700  | -1.24915600 |
| H | 1.16373600  | 3.24481300  | -1.27356100 |
| H | 2.90423500  | 2.95008900  | -1.23836300 |
| H | 1.85620000  | 1.89456400  | -2.18670100 |

**2-CHMe<sub>2</sub>-eq**

E= -831.87347

|   |             |             |             |
|---|-------------|-------------|-------------|
| C | -0.81601800 | -2.26830800 | -0.00057000 |
| C | -0.86427900 | -1.33256700 | -1.21433100 |
| C | 0.34664600  | -0.32353800 | -1.21333500 |
| C | 0.34665600  | -0.32401600 | 1.21318800  |
| C | -0.86406600 | -1.33338900 | 1.21387800  |
| C | -2.31055500 | -0.79463200 | -1.27226400 |
| C | 1.66797600  | -1.13662500 | -1.25695900 |
| C | 1.66798700  | -1.13713400 | 1.25660000  |
| C | -2.31051100 | -0.79596200 | 1.27269400  |
| N | 1.98968100  | -1.82325400 | -0.00031700 |
| C | 3.33313500  | -2.36383000 | -0.00042000 |
| N | -2.83699300 | -0.29545700 | 0.00054500  |
| C | -4.27430100 | -0.13596100 | 0.00041200  |
| H | -0.73826500 | -1.91181900 | -2.13953300 |
| H | 0.28865500  | 0.22391800  | -2.16139900 |
| H | 0.28851200  | 0.22310000  | 2.16144000  |
| H | -0.73754500 | -1.91322000 | 2.13864300  |
| H | 1.57813900  | -1.91130800 | -2.03503000 |
| H | 1.57808000  | -1.91213800 | 2.03434600  |
| H | 3.48423500  | -2.99145500 | 0.88653800  |

|   |             |             |             |
|---|-------------|-------------|-------------|
| H | 3.48419500  | -2.99122400 | -0.88755000 |
| H | 4.11681000  | -1.57734300 | -0.00034000 |
| H | -1.69595000 | -2.92852400 | -0.00069200 |
| H | 2.49430200  | -0.48037500 | -1.56783000 |
| H | 2.49433600  | -0.48110700 | 1.56780400  |
| H | -2.41044100 | 0.01071000  | -2.01683700 |
| H | -2.93099700 | -1.63696700 | -1.63935200 |
| H | -2.93054600 | -1.63898600 | 1.63892100  |
| H | -2.41053700 | 0.00847200  | 2.01825700  |
| H | -4.59007800 | 0.42830200  | -0.88566300 |
| H | -4.81732500 | -1.10468200 | -0.00141700 |
| H | -4.59053700 | 0.42520300  | 0.88827500  |
| H | 0.07580200  | -2.89084300 | -0.00086100 |
| C | 0.42866900  | 0.68547400  | 0.00005500  |
| N | 1.79615900  | 1.30724800  | 0.00003900  |
| C | 2.31266200  | 1.97284900  | -1.18581600 |
| H | 2.15441300  | 3.06624700  | -1.17320100 |
| H | 3.40050700  | 1.80933800  | -1.25150800 |
| H | 1.86611600  | 1.58906200  | -2.10350400 |
| C | 2.31335600  | 1.97133700  | 1.18651100  |
| H | 3.40084800  | 1.80572600  | 1.25298100  |
| H | 2.15715200  | 3.06501900  | 1.17402000  |
| H | 1.86532600  | 1.58832000  | 2.10377800  |
| C | -0.70298100 | 1.77795500  | 0.00024400  |
| H | -1.65072100 | 1.24400300  | 0.00122100  |
| C | -0.73909800 | 2.68469800  | 1.24891500  |
| H | -1.68894900 | 3.23535300  | 1.26100600  |
| H | -0.68461400 | 2.12634400  | 2.18978400  |
| H | 0.06102600  | 3.43185500  | 1.25480400  |
| C | -0.74099200 | 2.68360800  | -1.24915200 |
| H | -1.69129700 | 3.23348000  | -1.26086200 |
| H | 0.05851900  | 3.43139700  | -1.25634700 |
| H | -0.68680700 | 2.12461900  | -2.18966600 |

### 3-CHMe<sub>2</sub>-ax

E= -1083.71871

|   |             |             |             |
|---|-------------|-------------|-------------|
| C | -1.66766900 | 0.14712500  | 0.00005100  |
| C | -0.73859900 | -0.29274300 | 1.19185300  |
| C | 0.73861200  | 0.29274000  | 1.19184600  |
| C | 1.66764400  | -0.14712100 | 0.00002500  |
| C | 0.73859100  | 0.29268800  | -1.19183100 |
| C | -0.73863600 | -0.29268400 | -1.19181500 |
| N | -1.97055200 | 1.58737200  | 0.00009800  |
| C | -0.79494100 | -1.83828200 | 1.27074100  |
| C | 0.79501600  | 1.83827400  | 1.27072200  |
| N | 1.97046100  | -1.58737300 | 0.00004800  |
| C | 0.79499700  | 1.83821200  | -1.27084100 |
| C | -0.79503800 | -1.83821400 | -1.27080800 |
| N | 0.62006300  | 2.54273800  | -0.00007300 |
| C | -2.35646700 | 2.32127900  | -1.18305700 |
| C | -2.35641800 | 2.32118300  | 1.18333300  |
| C | 1.15182200  | 3.88568300  | -0.00009900 |
| N | -0.62006400 | -2.54274400 | -0.00005500 |
| C | -1.15177200 | -3.88570500 | -0.00004900 |

|   |             |             |             |
|---|-------------|-------------|-------------|
| C | 2.35638800  | -2.32120400 | -1.18316300 |
| C | 2.35657900  | -2.32114400 | 1.18323100  |
| H | -1.15645800 | 0.04718400  | 2.14652300  |
| H | 1.15649900  | -0.04721000 | 2.14649500  |
| H | 1.15645200  | -0.04736900 | -2.14645200 |
| H | -1.15652500 | 0.04735800  | -2.14642800 |
| H | 0.03562200  | 2.19144300  | 1.98062400  |
| H | 0.03554500  | 2.19130500  | -1.98072800 |
| H | -3.42626300 | 2.60327000  | -1.16982800 |
| H | -1.78070200 | 3.26073900  | -1.24599000 |
| H | -2.18494100 | 1.75785700  | -2.09991200 |
| H | -1.78067700 | 3.26066200  | 1.24628800  |
| H | -3.42621400 | 2.60314800  | 1.17021500  |
| H | -2.18476900 | 1.75771300  | 2.10014300  |
| H | 0.80138400  | 4.43018500  | -0.88555600 |
| H | 0.80110600  | 4.43035800  | 0.88514500  |
| H | 2.26470600  | 3.92558800  | 0.00008300  |
| H | 1.76267600  | 2.11002900  | 1.72637700  |
| H | 1.76261600  | 2.10997100  | -1.72657300 |
| H | -0.03547200 | -2.19141500 | 1.98058200  |
| H | -1.76255000 | -2.11006100 | 1.72648500  |
| H | -1.76267600 | -2.10998200 | -1.72650200 |
| H | -0.03561000 | -2.19129500 | -1.98072700 |
| H | -0.80097400 | -4.43037900 | 0.88516500  |
| H | -2.26465700 | -3.92566000 | 0.00021300  |
| H | -0.80138100 | -4.43019300 | -0.88553200 |
| H | 1.78075900  | -3.26074900 | -1.24604300 |
| H | 2.18465600  | -1.75779700 | -2.09999300 |
| H | 3.42622800  | -2.60302000 | -1.17005900 |
| H | 1.78092900  | -3.26067100 | 1.24626400  |
| H | 3.42640100  | -2.60300900 | 1.16995300  |
| H | 2.18501600  | -1.75769000 | 2.10007000  |
| C | -3.04629200 | -0.66063600 | -0.00002800 |
| H | -2.84392800 | -1.73168600 | -0.00012500 |
| C | -3.91287300 | -0.40009000 | -1.24851500 |
| H | -4.75048900 | -1.10940800 | -1.26389400 |
| H | -4.34143600 | 0.60615100  | -1.24729100 |
| H | -3.36370600 | -0.53075900 | -2.18749900 |
| C | -3.91296300 | -0.40034200 | 1.24845000  |
| H | -4.34141700 | 0.60594000  | 1.24747100  |
| H | -4.75065300 | -1.10957900 | 1.26352400  |
| H | -3.36391400 | -0.53133700 | 2.18745400  |
| C | 3.04626500  | 0.66061000  | 0.00000000  |
| H | 2.84390800  | 1.73166200  | -0.00000400 |
| C | 3.91292500  | 0.40022700  | 1.24846800  |
| H | 4.34145000  | -0.60602200 | 1.24739800  |
| H | 4.75056600  | 1.10952000  | 1.26364900  |
| H | 3.36383400  | 0.53109100  | 2.18746600  |
| C | 3.91285100  | 0.40013600  | -1.24850100 |
| H | 4.75049000  | 1.10942800  | -1.26381000 |
| H | 4.34138100  | -0.60611900 | -1.24736500 |
| H | 3.36369700  | 0.53090400  | -2.18747800 |

### 3-CHMe<sub>2</sub>-eq

E= -1083.71493

|   |             |             |             |
|---|-------------|-------------|-------------|
| C | 1.65945200  | -0.31470900 | -0.00008400 |
| C | 0.76744700  | 0.21606300  | 1.19102800  |
| C | -0.76740700 | -0.21617600 | 1.19104100  |
| C | -1.65944400 | 0.31468600  | -0.00001600 |
| C | -0.76748300 | -0.21608200 | -1.19113100 |
| C | 0.76738000  | 0.21613000  | -1.19115500 |
| C | 0.96432800  | 1.75221100  | 1.27509100  |
| C | -0.96420500 | -1.75235000 | 1.27501900  |
| C | -0.96437500 | -1.75224800 | -1.27519000 |
| C | 0.96430700  | 1.75227800  | -1.27513900 |
| N | -0.91424100 | -2.47141200 | -0.00011300 |
| C | -1.65707000 | -3.71099800 | -0.00007600 |
| N | 0.91406700  | 2.47142100  | -0.00000900 |
| C | 1.65700500  | 3.71098400  | 0.00000900  |
| H | 1.13616400  | -0.17752800 | 2.14629000  |
| H | -1.13605100 | 0.17736800  | 2.14634500  |
| H | -1.13617300 | 0.17753200  | -2.14638900 |
| H | 1.13605900  | -0.17741000 | -2.14644600 |
| H | -0.19040500 | -2.16706400 | 1.94301700  |
| H | -0.19070000 | -2.16692800 | -1.94334400 |
| H | -1.39732100 | -4.30562600 | -0.88481800 |
| H | -1.39685300 | -4.30587400 | 0.88436800  |
| H | -2.75561700 | -3.55839900 | 0.00024000  |
| H | -1.92283300 | -1.95443400 | 1.76838300  |
| H | -1.92310000 | -1.95423500 | -1.76840600 |
| H | 0.19066900  | 2.16689800  | 1.94325800  |
| H | 1.92306200  | 1.95423200  | 1.76824100  |
| H | 1.92305400  | 1.95428700  | -1.76828200 |
| H | 0.19065400  | 2.16702700  | -1.94326900 |
| H | 1.39709700  | 4.30564400  | 0.88467800  |
| H | 2.75552100  | 3.55829500  | -0.00010900 |
| H | 1.39693100  | 4.30577000  | -0.88452900 |
| N | 2.95831700  | 0.44376800  | 0.00002100  |
| N | -2.95834500 | -0.44387200 | -0.00001100 |
| C | -3.80027700 | -0.47497000 | -1.18683500 |
| H | -4.26777700 | -1.46836700 | -1.28303000 |
| H | -4.62238300 | 0.26190500  | -1.15041000 |
| H | -3.23462500 | -0.28516200 | -2.09938600 |
| C | -3.79998600 | -0.47534700 | 1.18698200  |
| H | -4.62211000 | 0.26154800  | 1.15097300  |
| H | -4.26746700 | -1.46877300 | 1.28300600  |
| H | -3.23415800 | -0.28577800 | 2.09947300  |
| C | 3.80003800  | 0.47511700  | 1.18696600  |
| H | 4.62234300  | -0.26154900 | 1.15064500  |
| H | 4.26724000  | 1.46864700  | 1.28327900  |
| H | 3.23429200  | 0.28507700  | 2.09941100  |
| C | 3.80014400  | 0.47528500  | -1.18685100 |
| H | 4.26754000  | 1.46875600  | -1.28280100 |
| H | 4.62231400  | -0.26153800 | -1.15070900 |
| H | 3.23444300  | 0.28567400  | -2.09940700 |
| C | -1.93643500 | 1.86406700  | 0.00010000  |
| H | -0.97387200 | 2.36684600  | 0.00019900  |
| C | -2.67182100 | 2.40183500  | -1.24772000 |

|   |             |             |             |
|---|-------------|-------------|-------------|
| H | -2.56630600 | 3.49433200  | -1.27500200 |
| H | -2.26361700 | 2.02125100  | -2.19033700 |
| H | -3.74528700 | 2.18736500  | -1.23600100 |
| C | -2.67208400 | 2.40157300  | 1.24785400  |
| H | -2.56696000 | 3.49411300  | 1.27518300  |
| H | -3.74547900 | 2.18674800  | 1.23607900  |
| H | -2.26380500 | 2.02113200  | 2.19049400  |
| C | 1.93649000  | -1.86409800 | -0.00003200 |
| H | 0.97398500  | -2.36690100 | -0.00001900 |
| C | 2.67203800  | -2.40146800 | 1.24782200  |
| H | 2.56711900  | -3.49402300 | 1.27513900  |
| H | 3.74539300  | -2.18642600 | 1.23619700  |
| H | 2.26353300  | -2.02107900 | 2.19039300  |
| C | 2.67207700  | -2.40177600 | -1.24775100 |
| H | 2.56672200  | -3.49428900 | -1.27503700 |
| H | 2.26393500  | -2.02127200 | -2.19042900 |
| H | 3.74552200  | -2.18717600 | -1.23593800 |
